# Supplementary material for: Pure phosphotriesters as versatile ligands in transition metal catalysis: efficient hydrosilylation of ketones and diethylzinc addition to aldehydes
Source: Royal Society of Chemistry journal article supplement (doi:10.1039/c7nj00566k), 2017-01-01

# Pure phosphotriesters as versatile ligands in transition metal catalysis: efficient hydrosilylation of ketones and diethylzinc addition to aldehydes

M. Bouhachicha,<sup>a</sup> A. Ngo Ndimba,<sup>a</sup> T. Roisnel,<sup>b</sup> C. Lalli<sup>a</sup> and G. Argouarch<sup>a</sup>

<sup>a</sup> Institut des Sciences Chimiques de Rennes, UMR CNRS 6226, Equipe CORINT,  
Université de Rennes 1, 2 Avenue du Professeur Léon Bernard, 35043 Rennes Cedex, France.

<sup>b</sup> Institut des Sciences Chimiques de Rennes, UMR CNRS 6226, Centre de Diffractométrie X,  
Université de Rennes 1, 263 Avenue du Général Leclerc, 35042 Rennes Cedex, France.

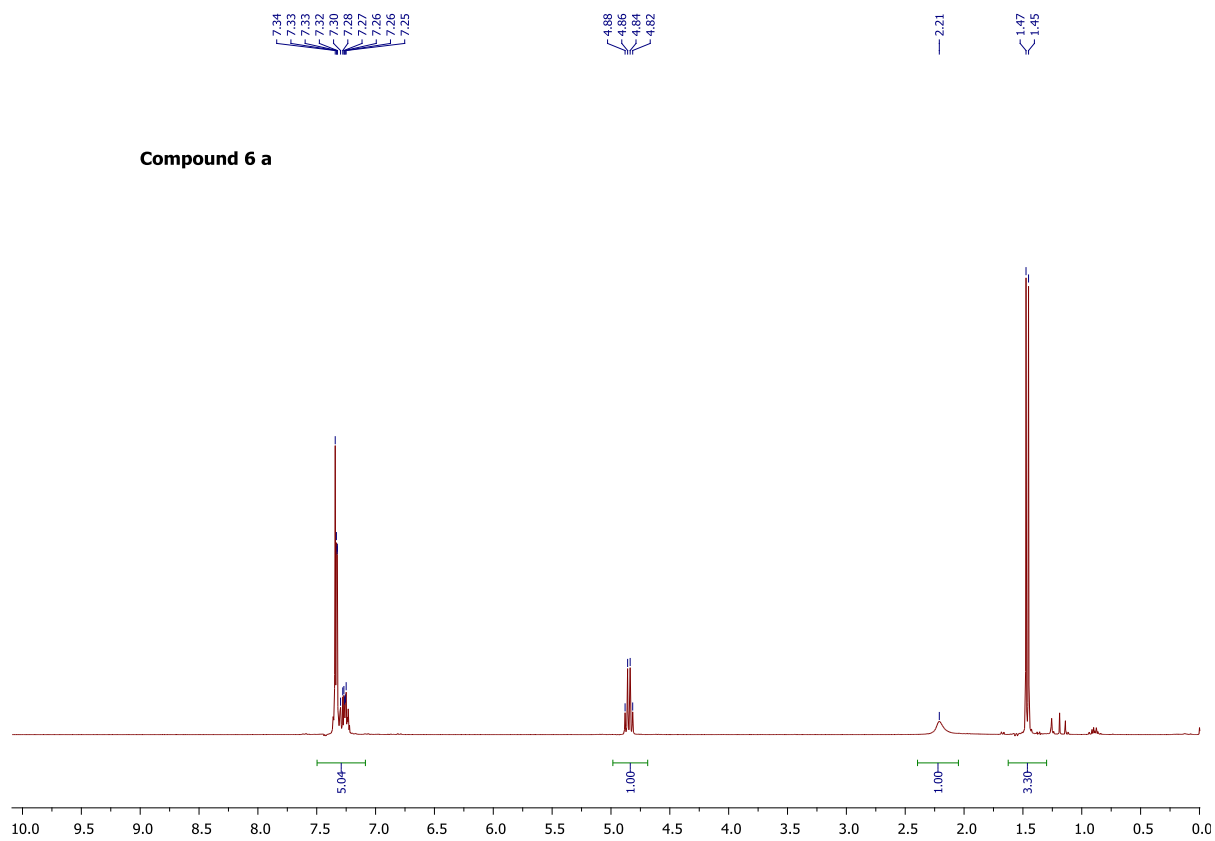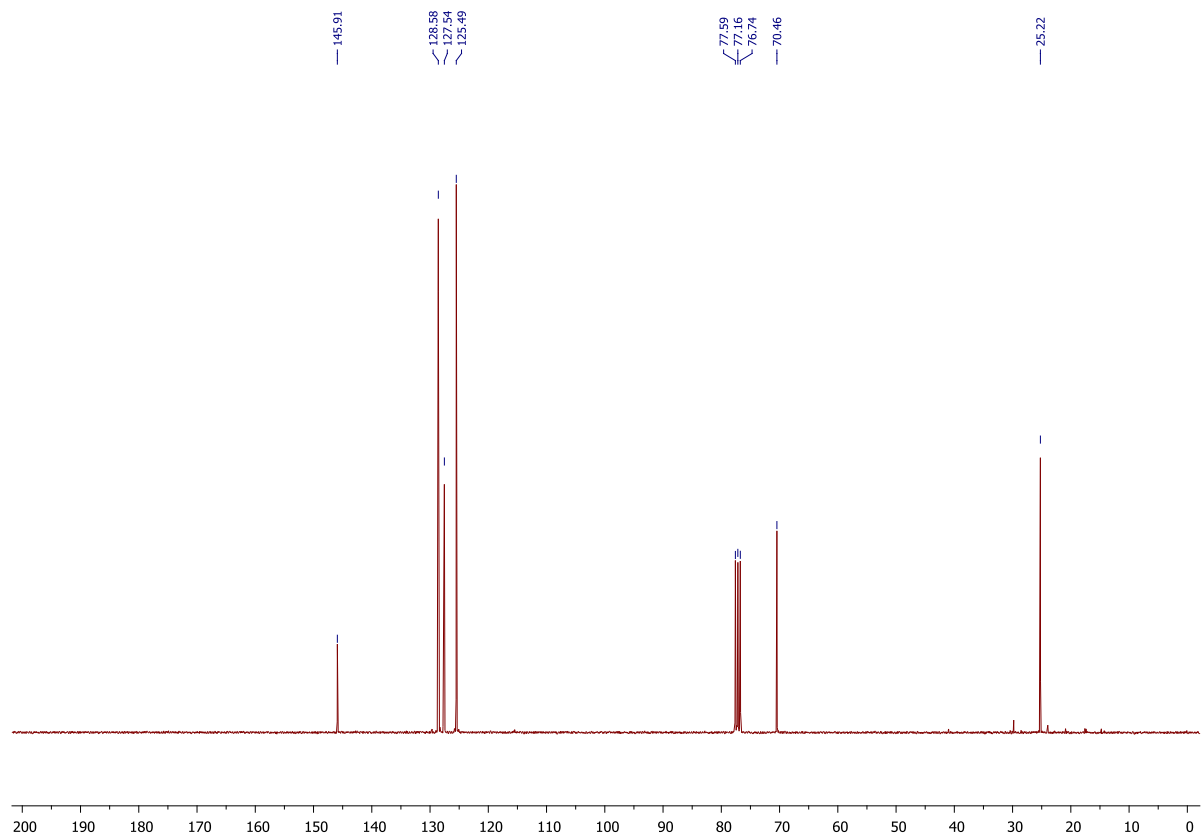

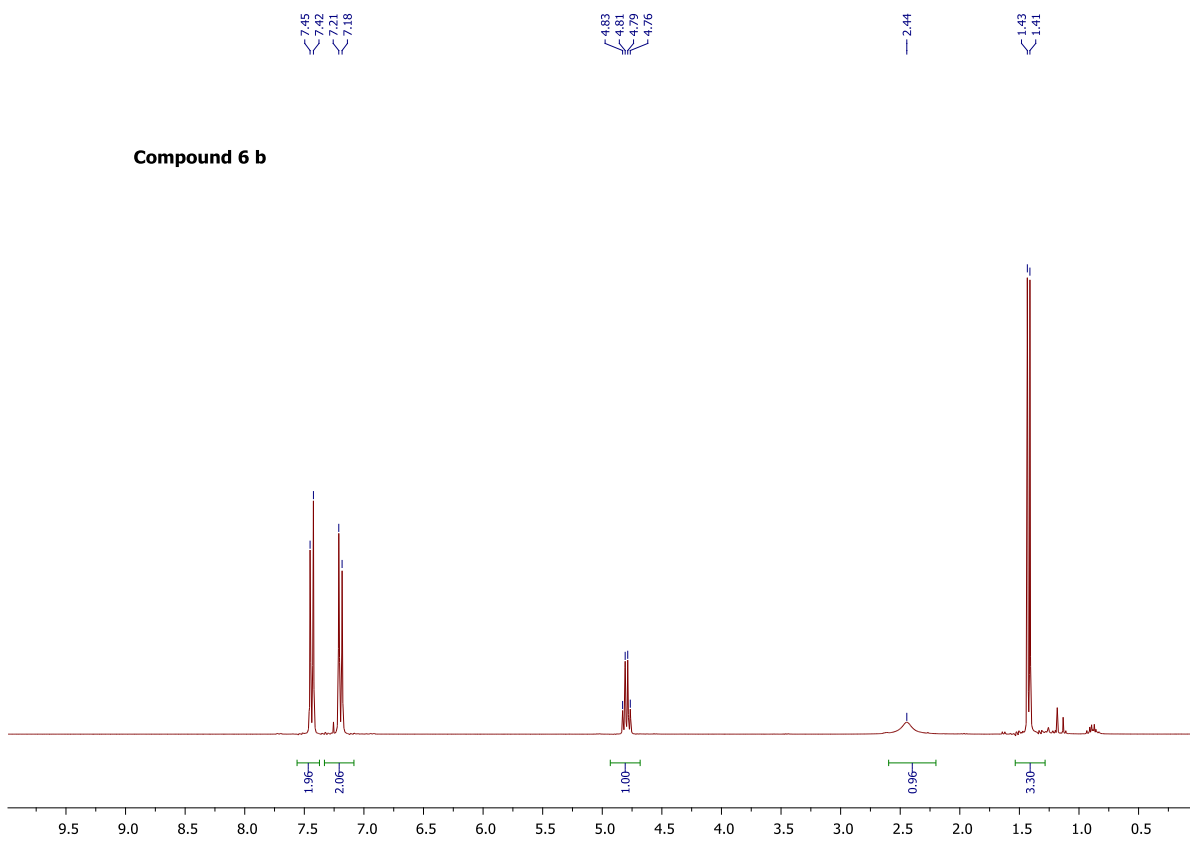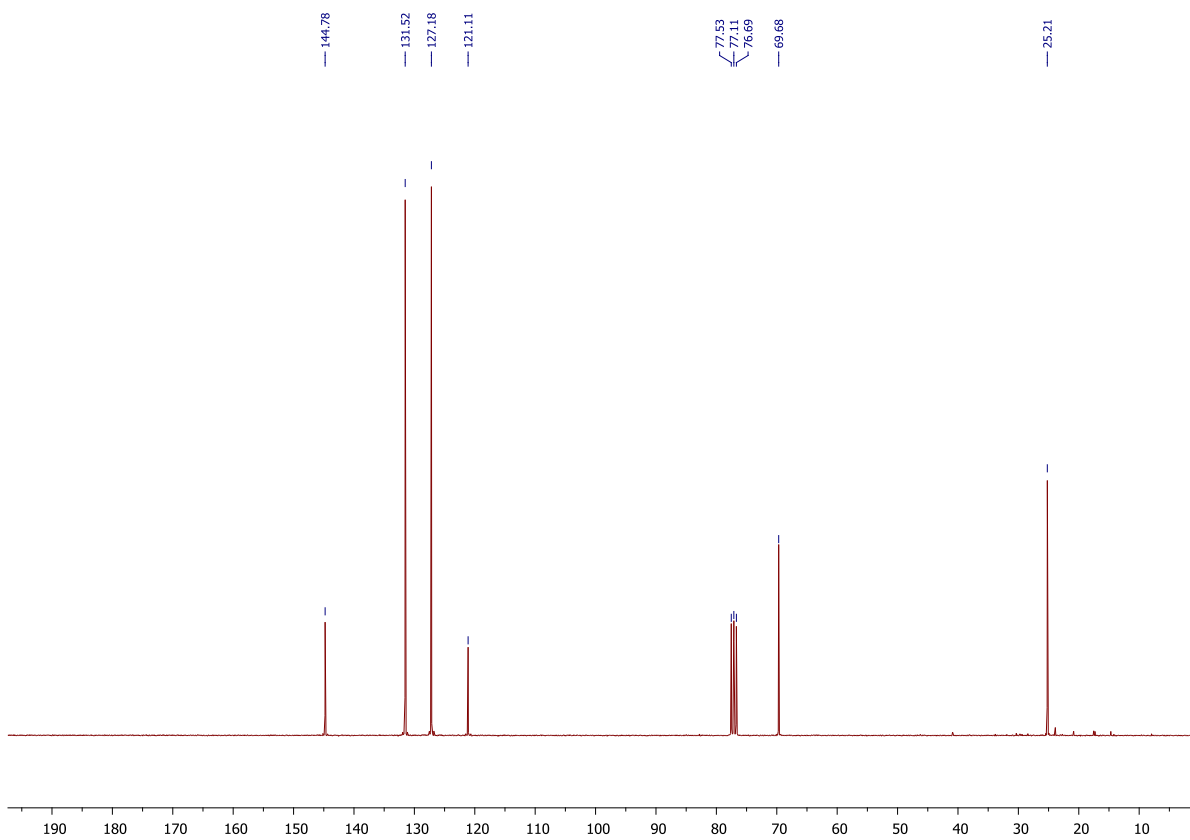

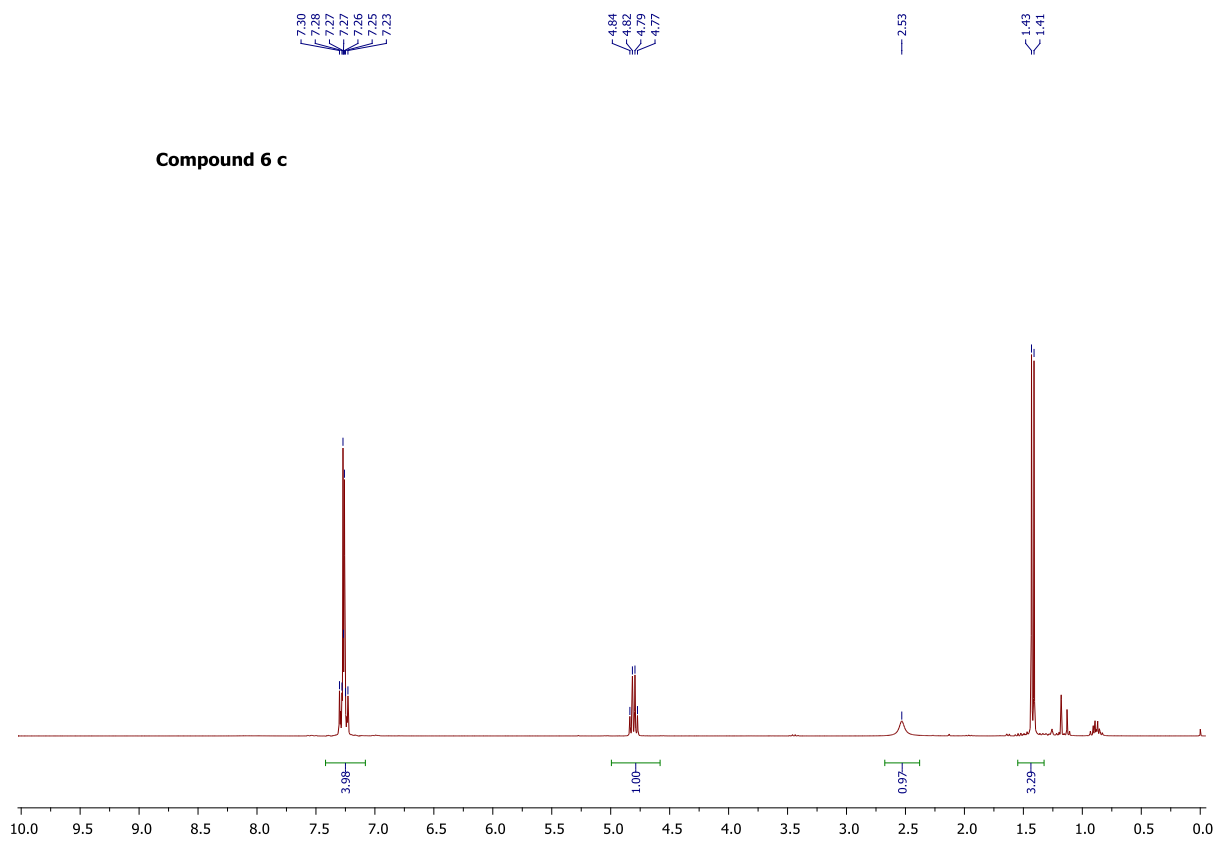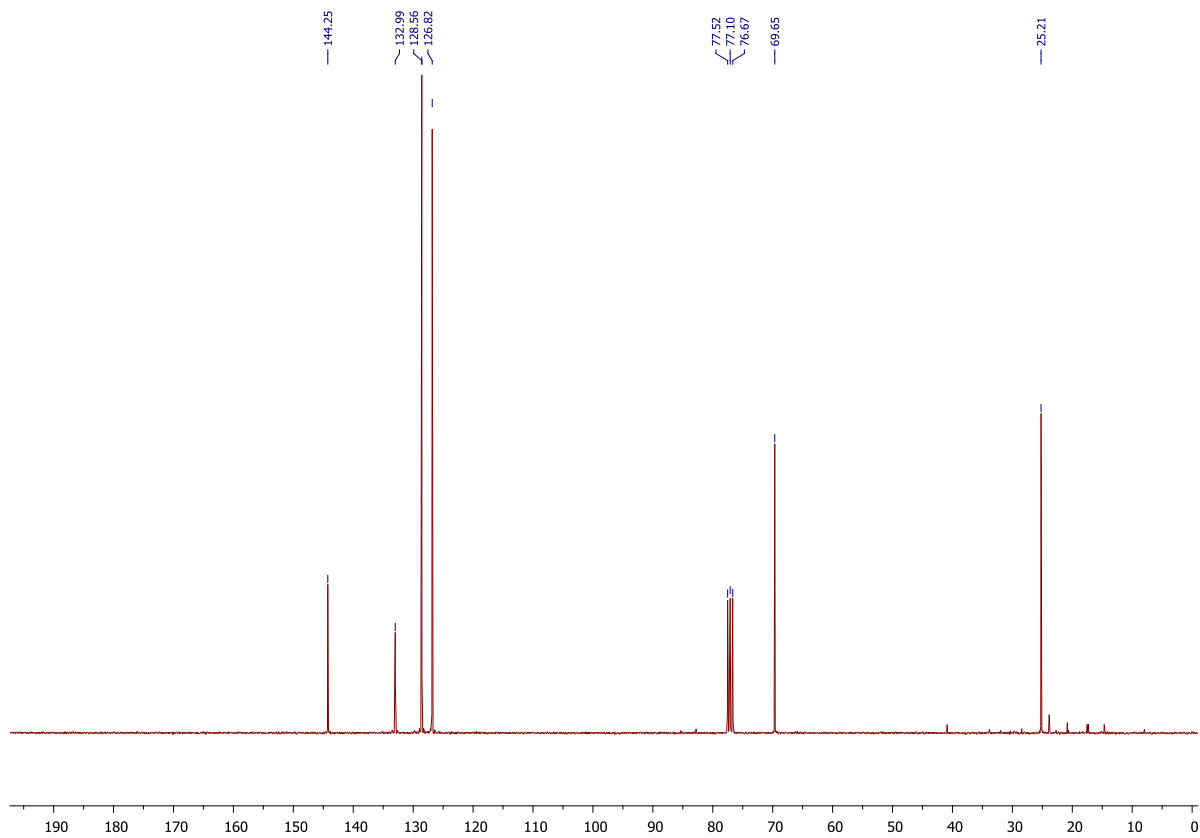

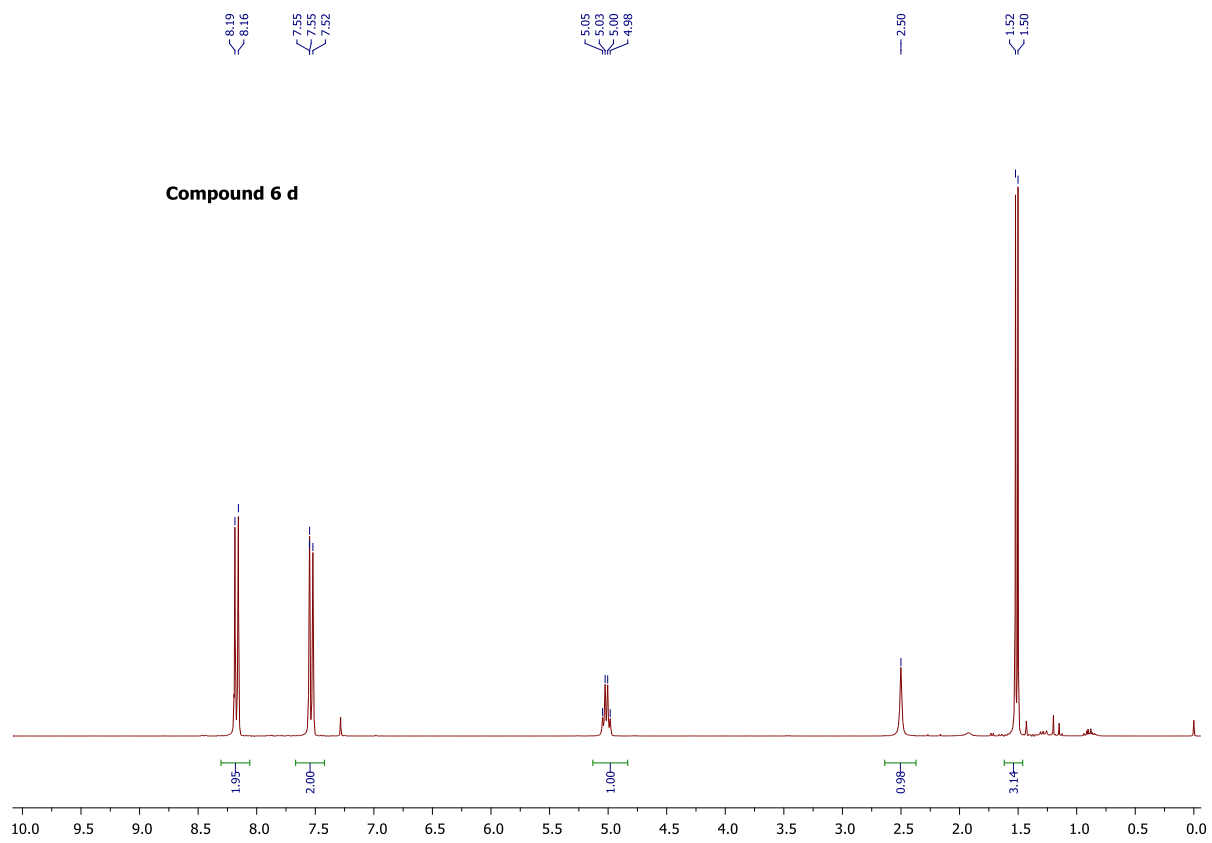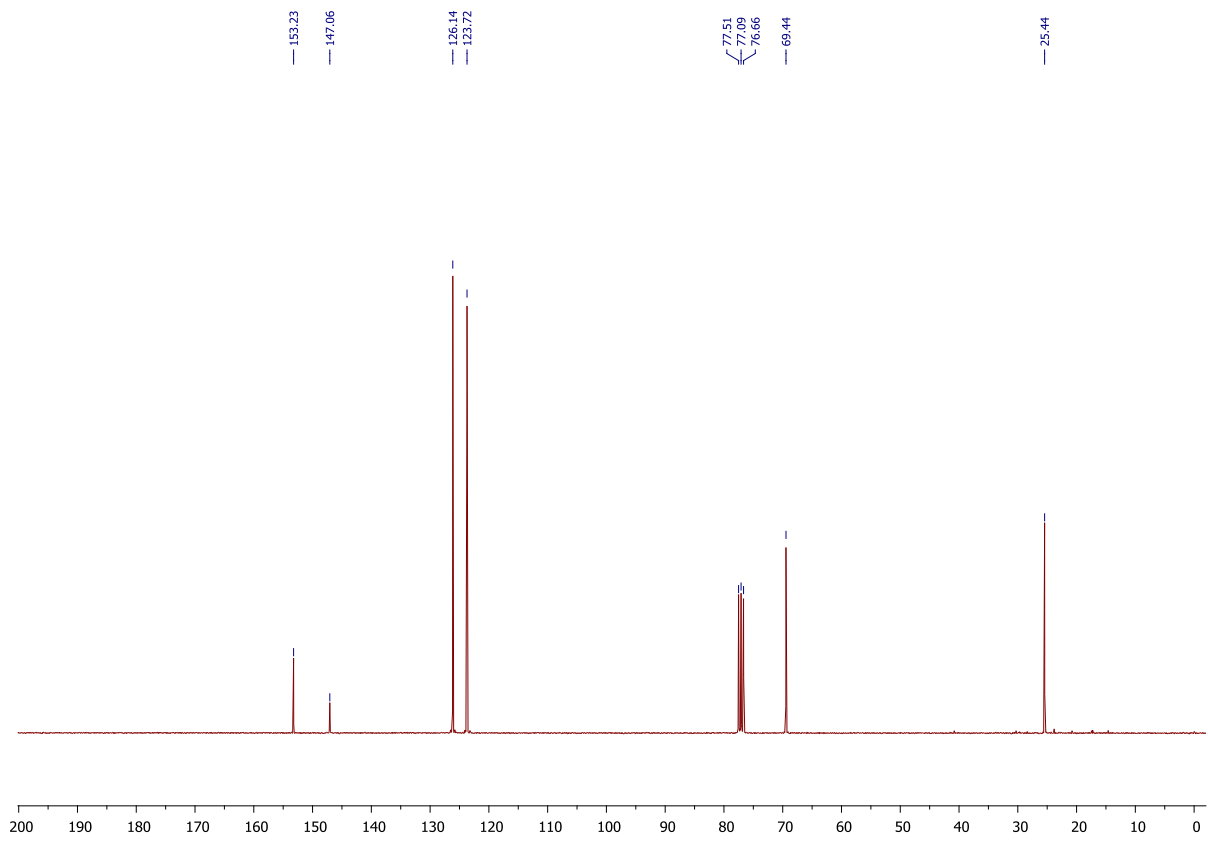

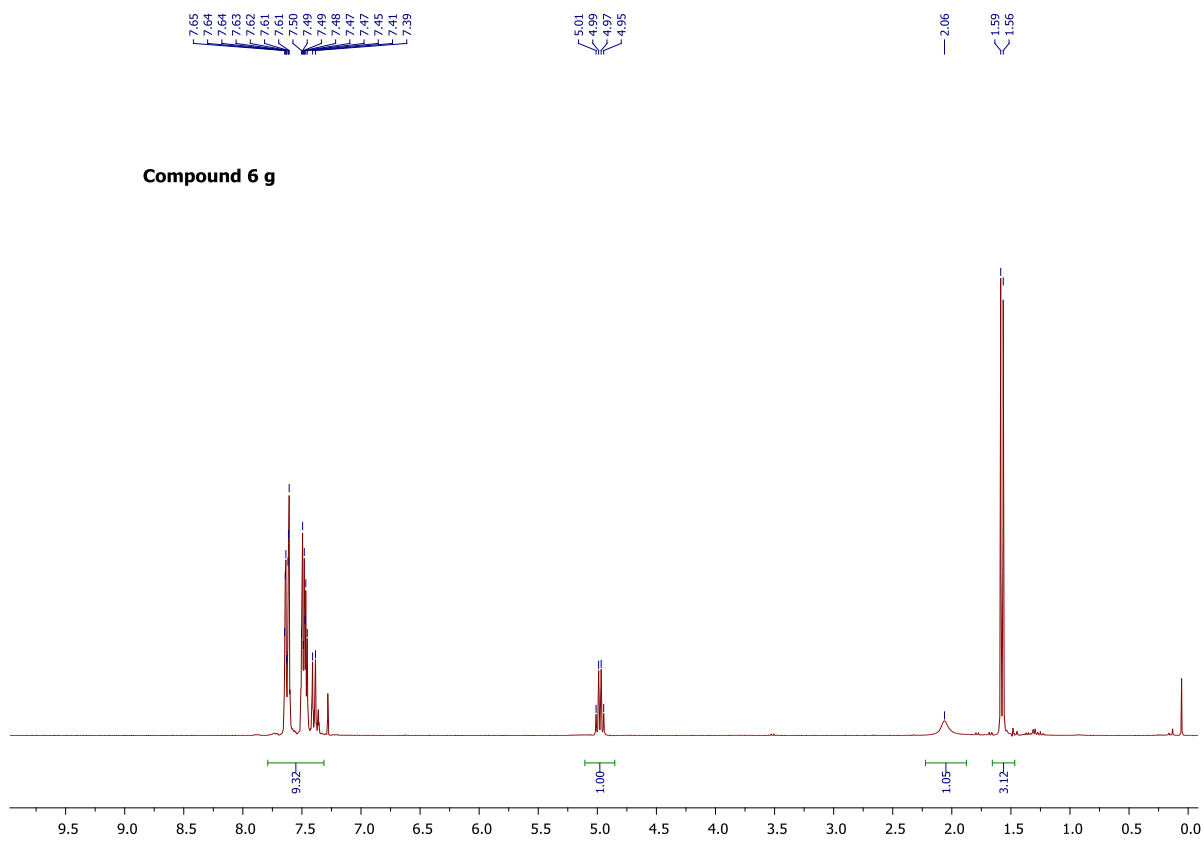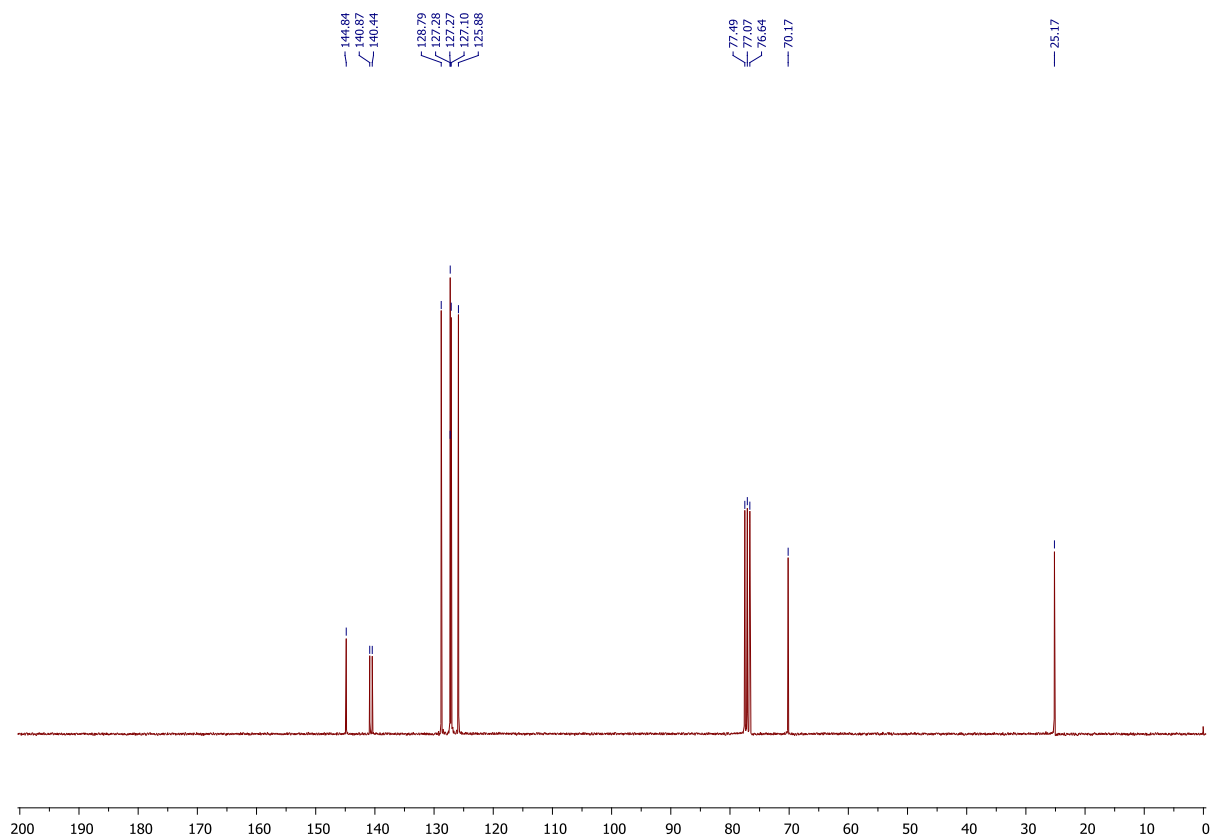

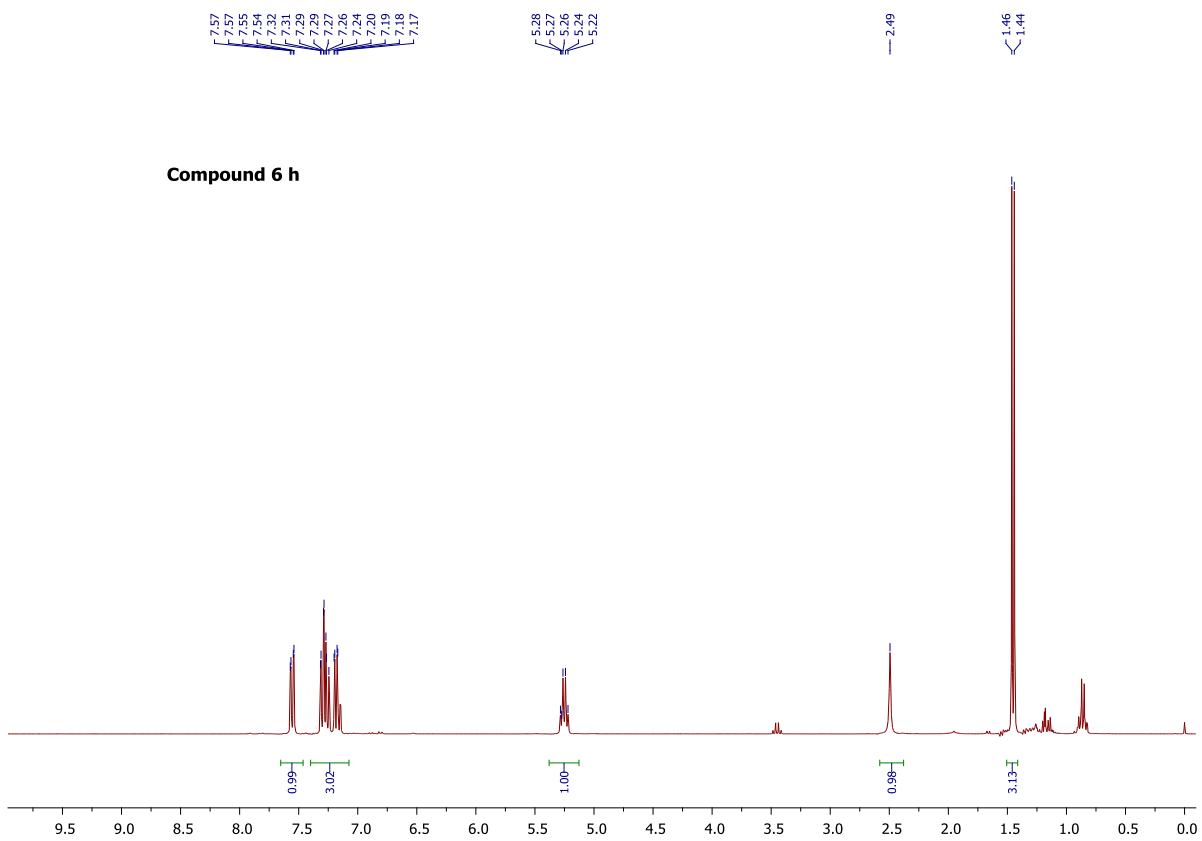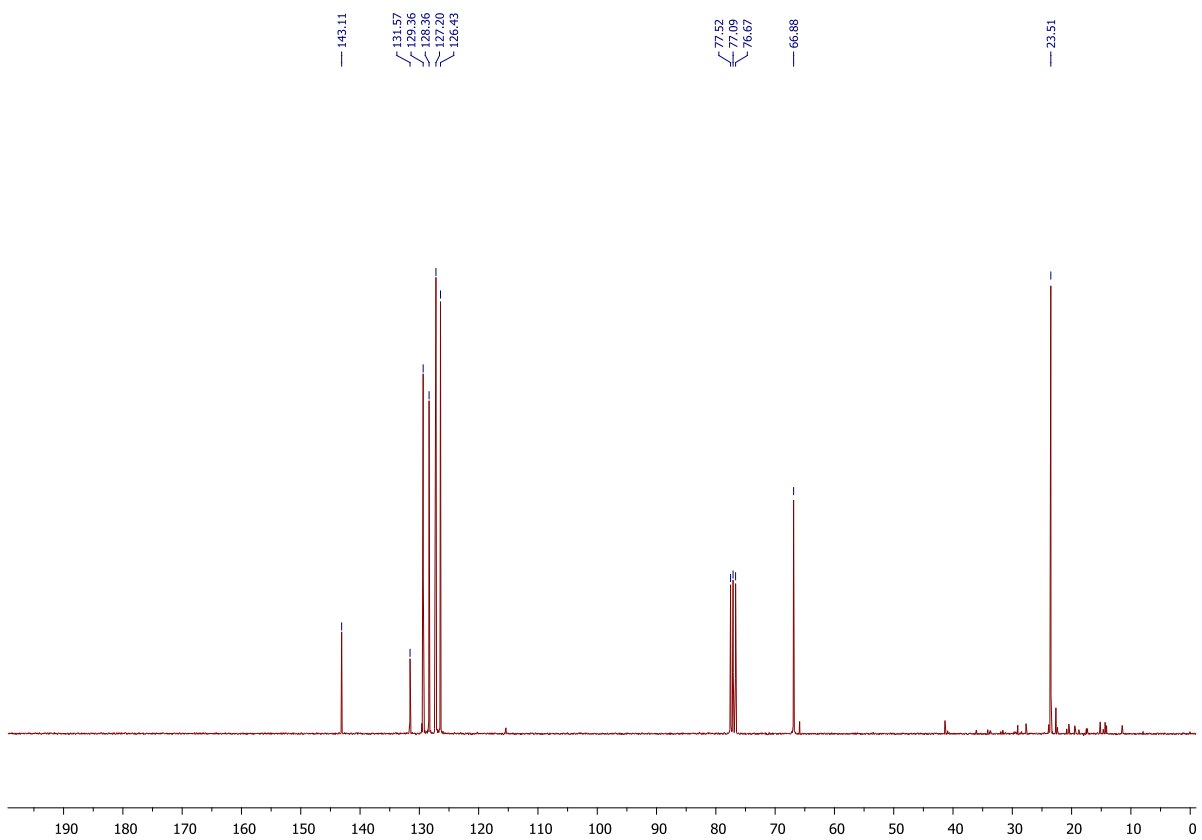

Compound 6 j

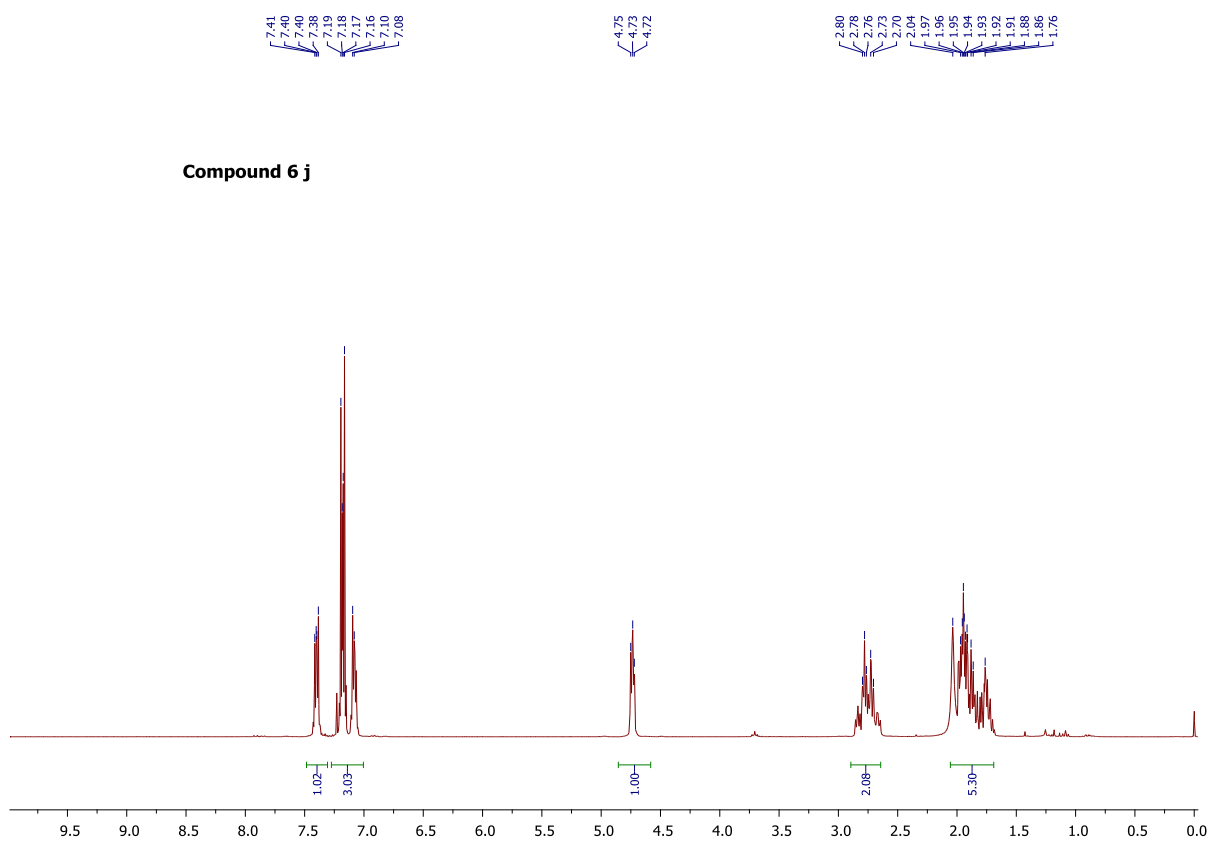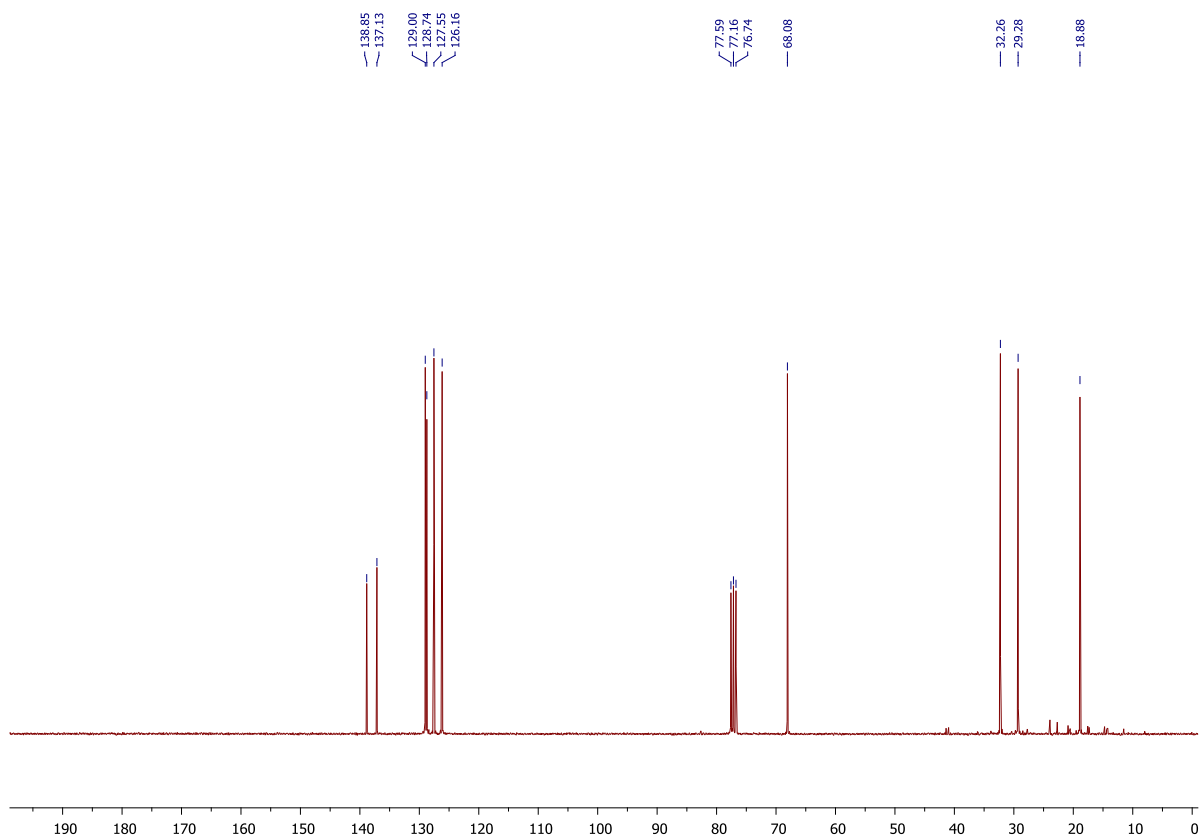



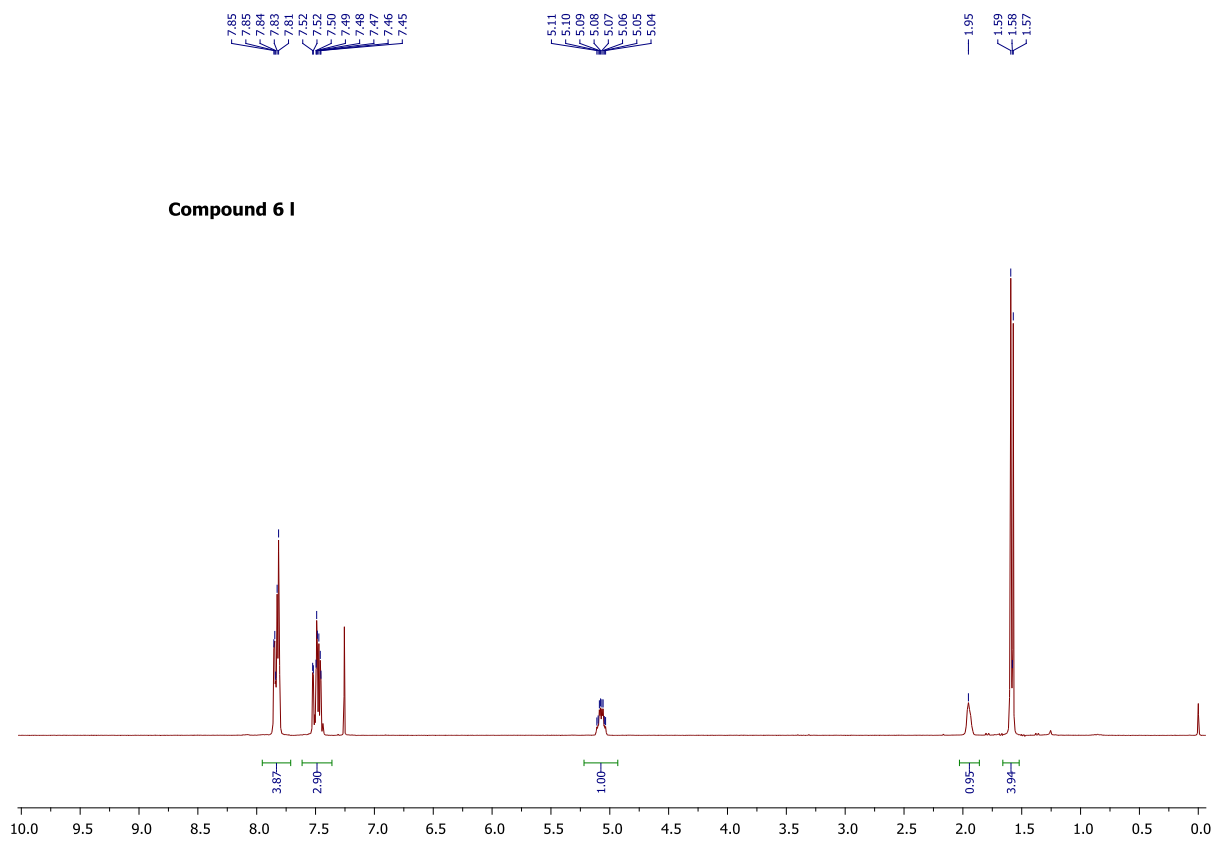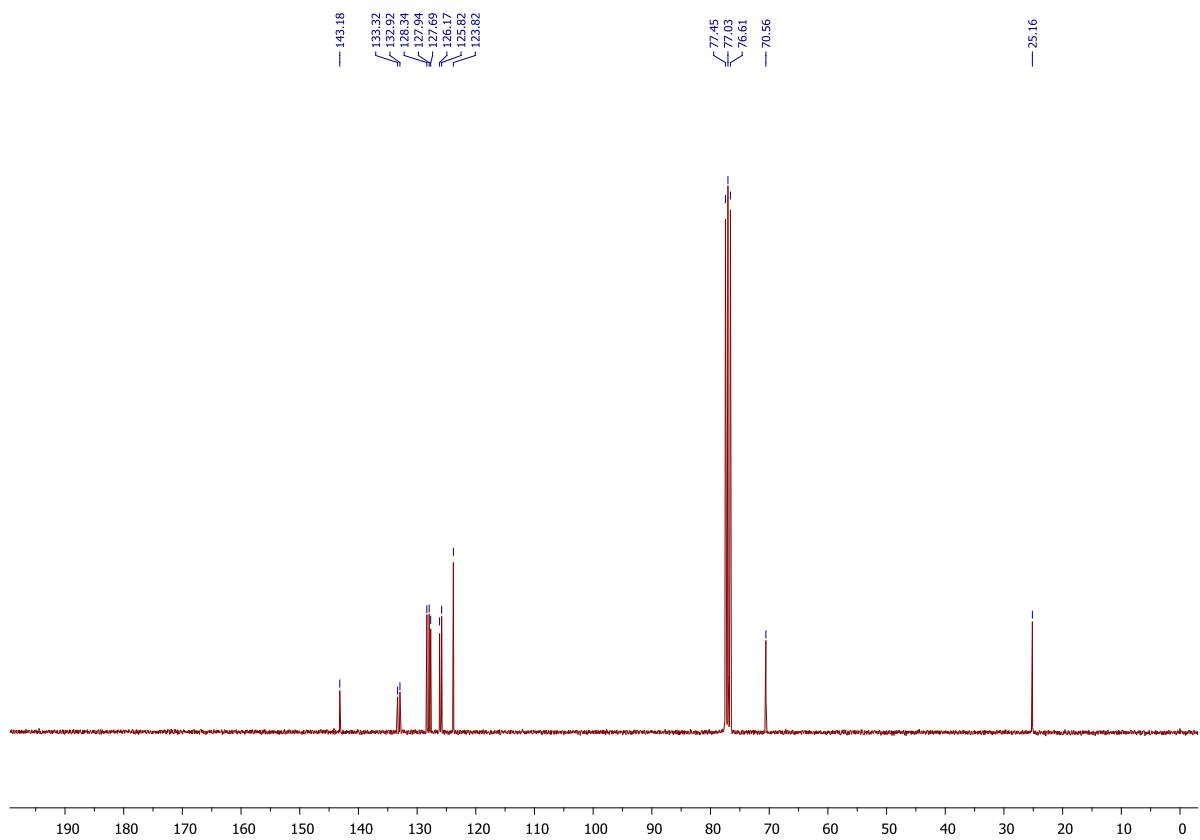

7.47  
7.46  
7.42  
7.41  
7.40  
7.40

5.05  
5.02  
5.01  
5.00  
4.99  
4.97

2.69  
2.67

Compound 6 m

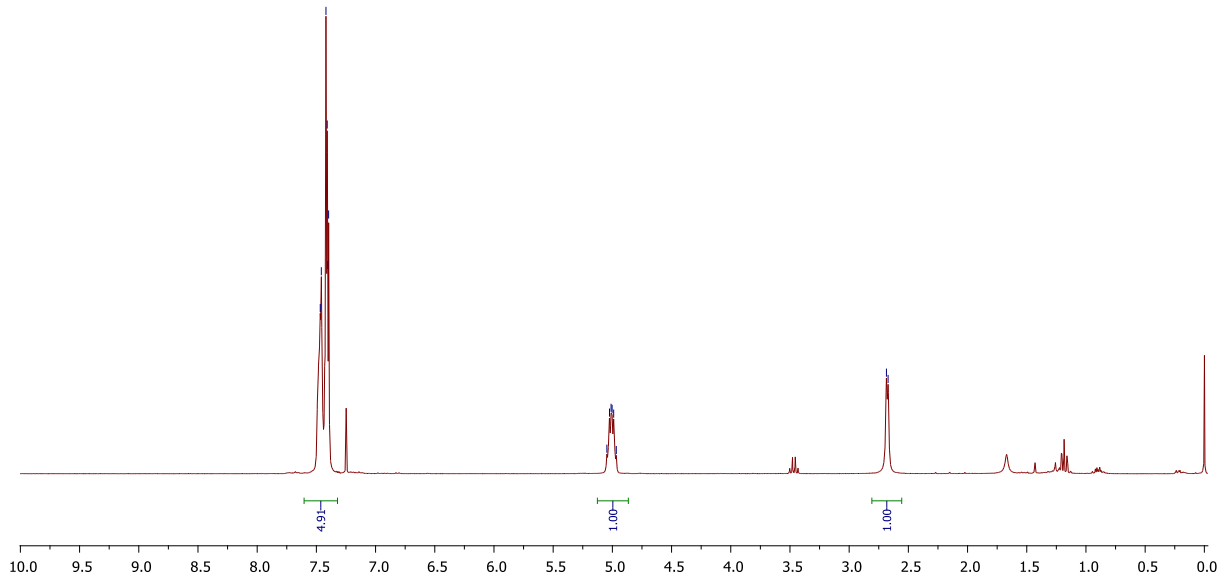

134.11  
130.00  
129.72  
128.79  
127.89  
126.36  
122.52  
118.79

77.59  
77.55  
77.17  
76.74  
73.62  
73.20  
72.77  
72.35

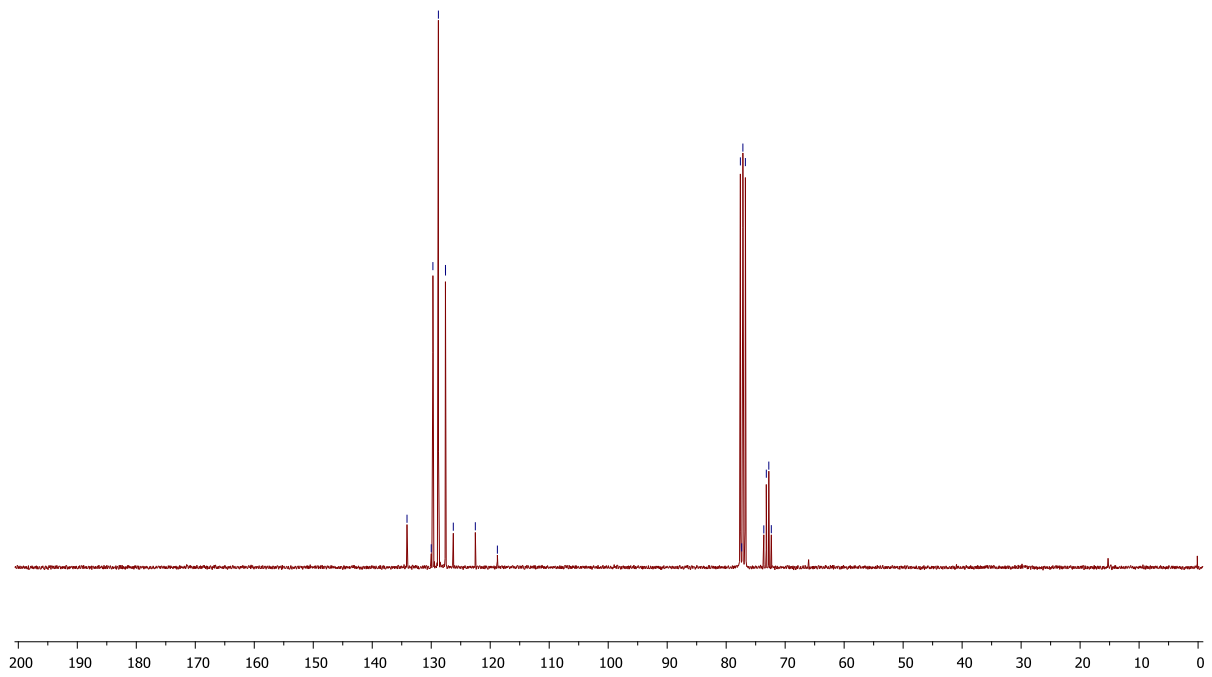

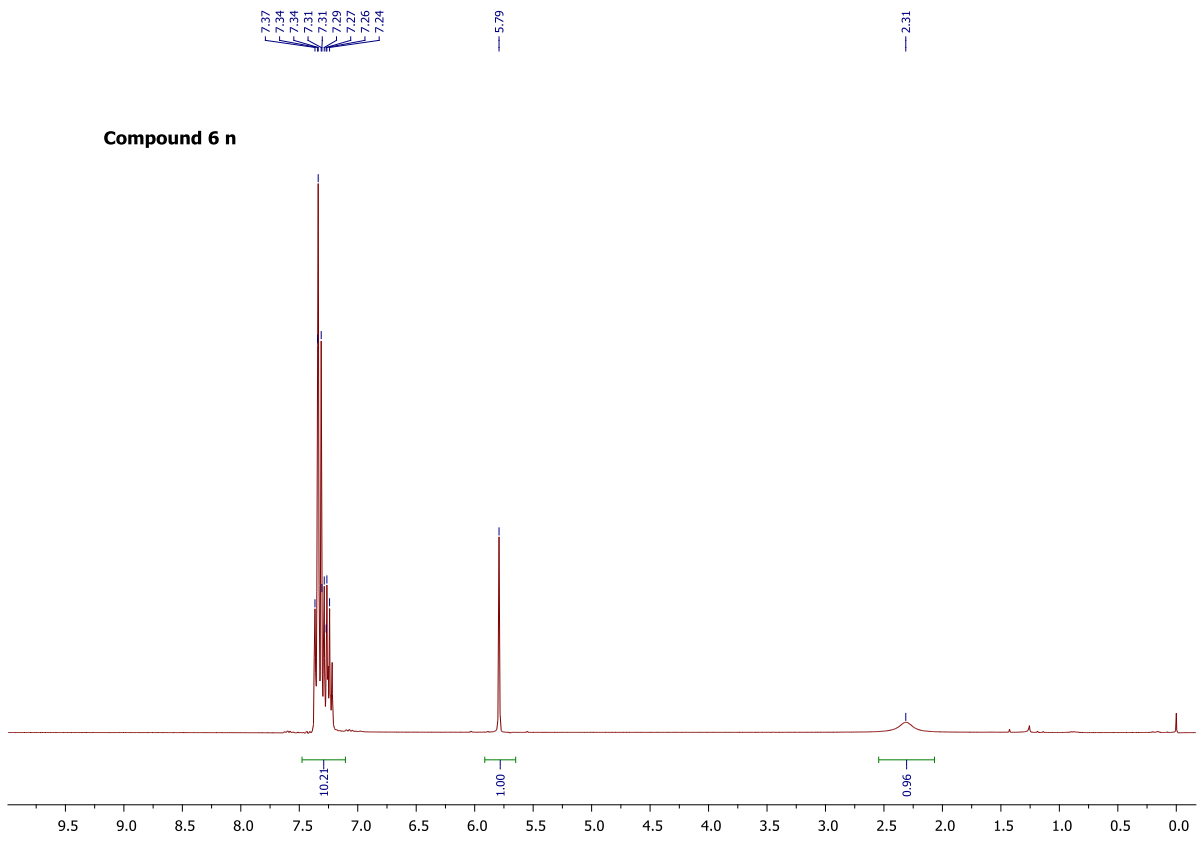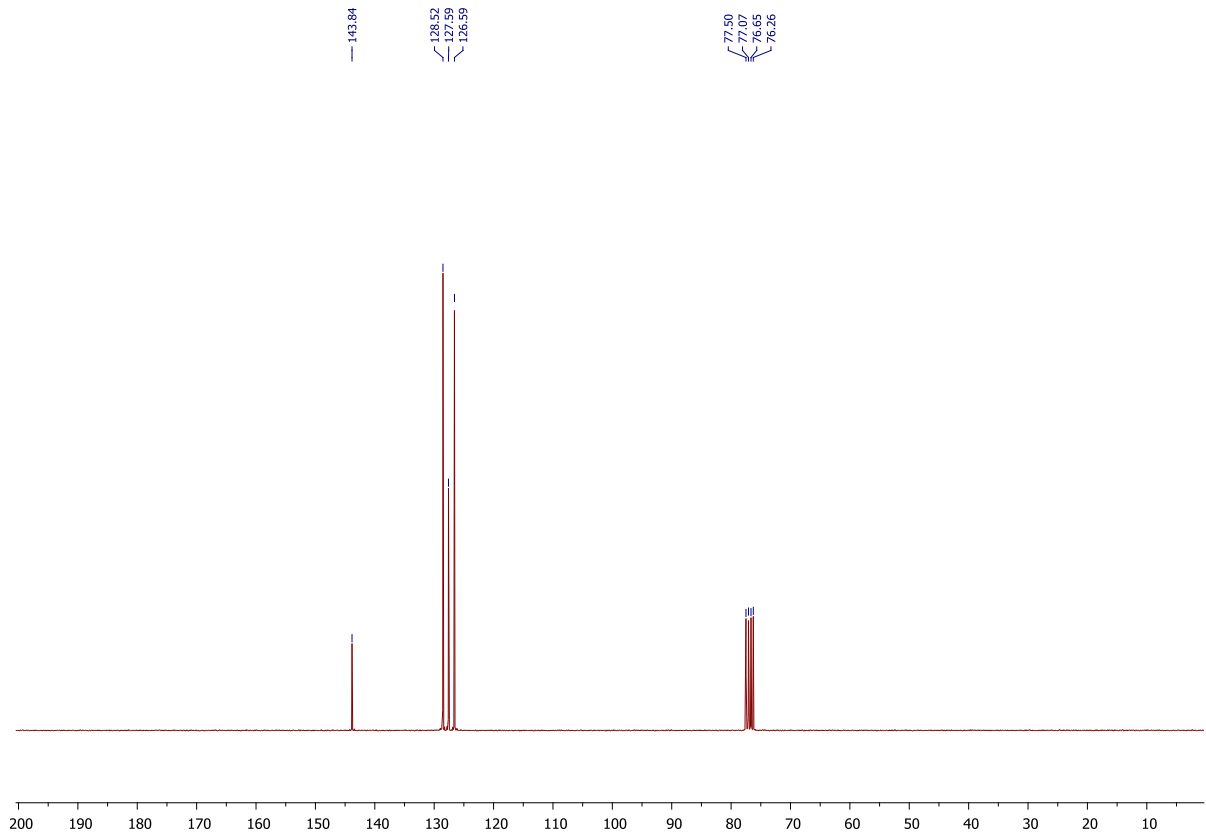

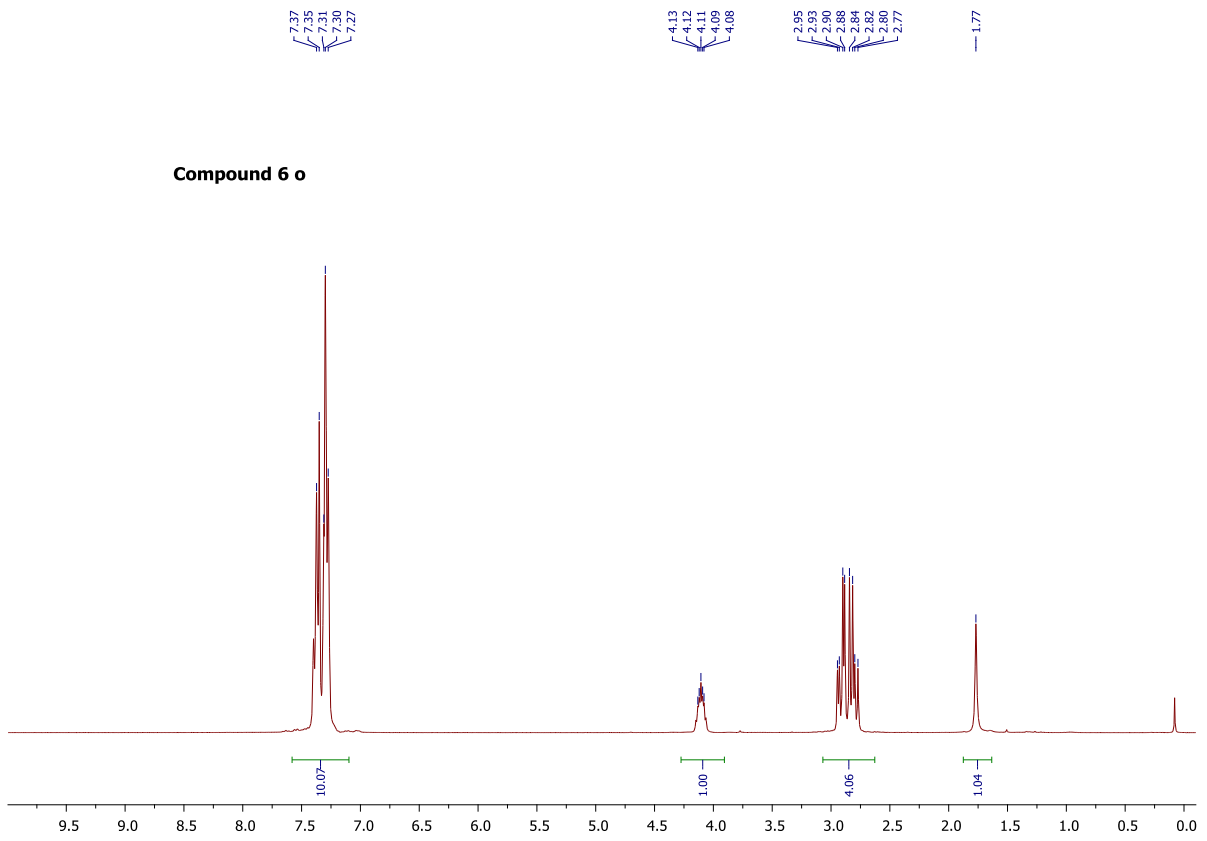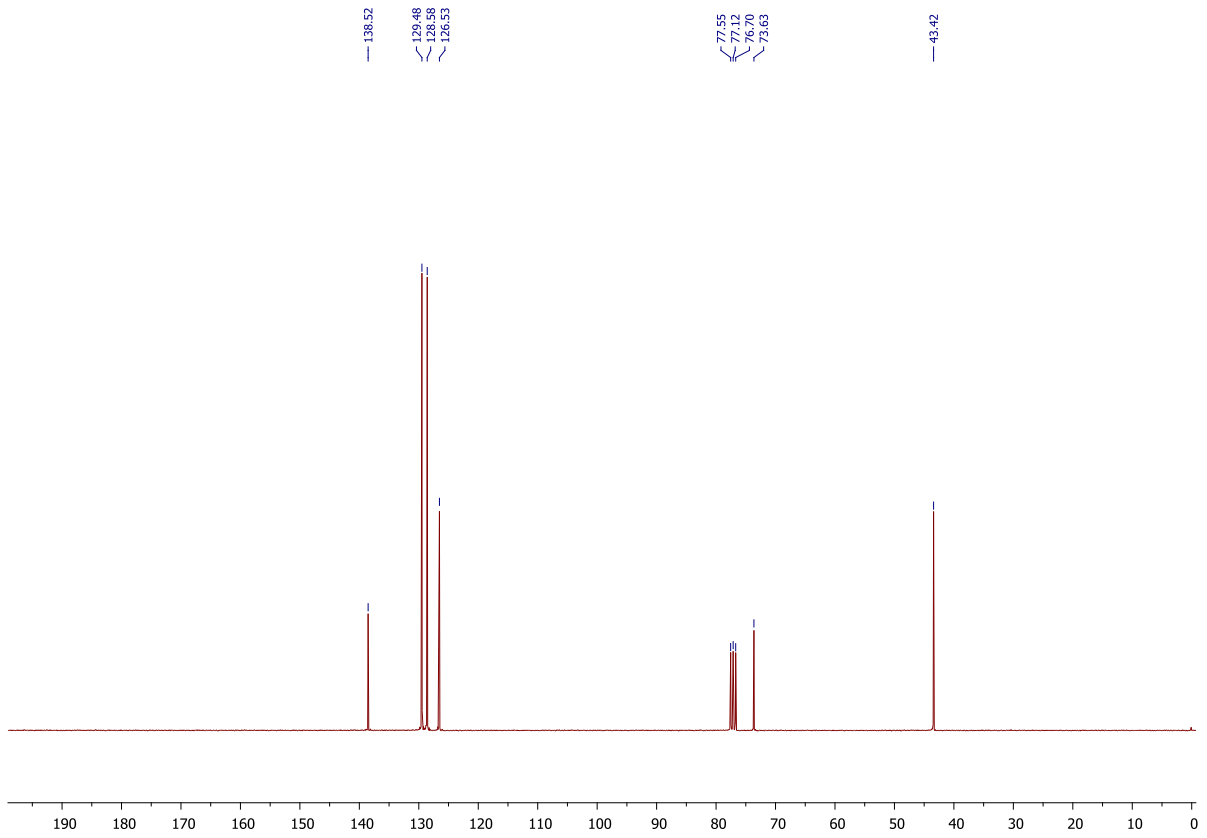

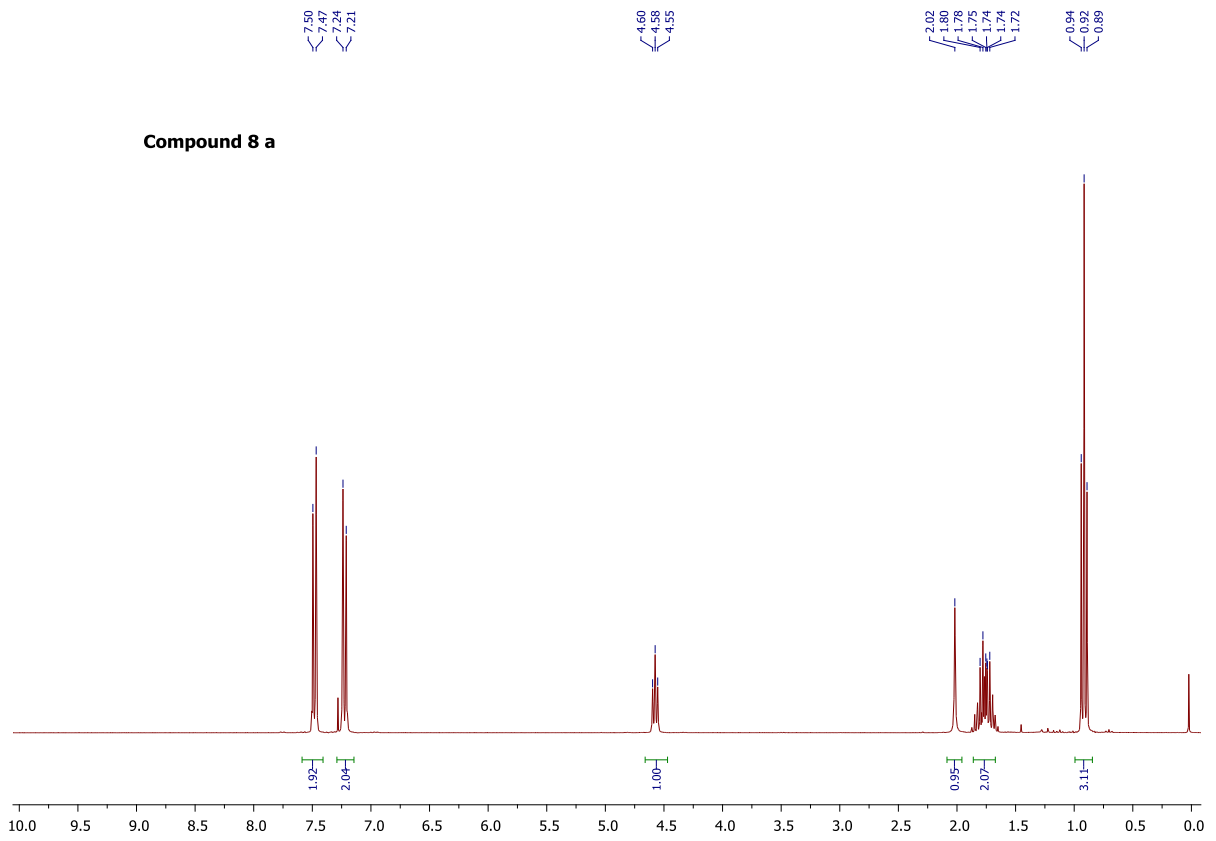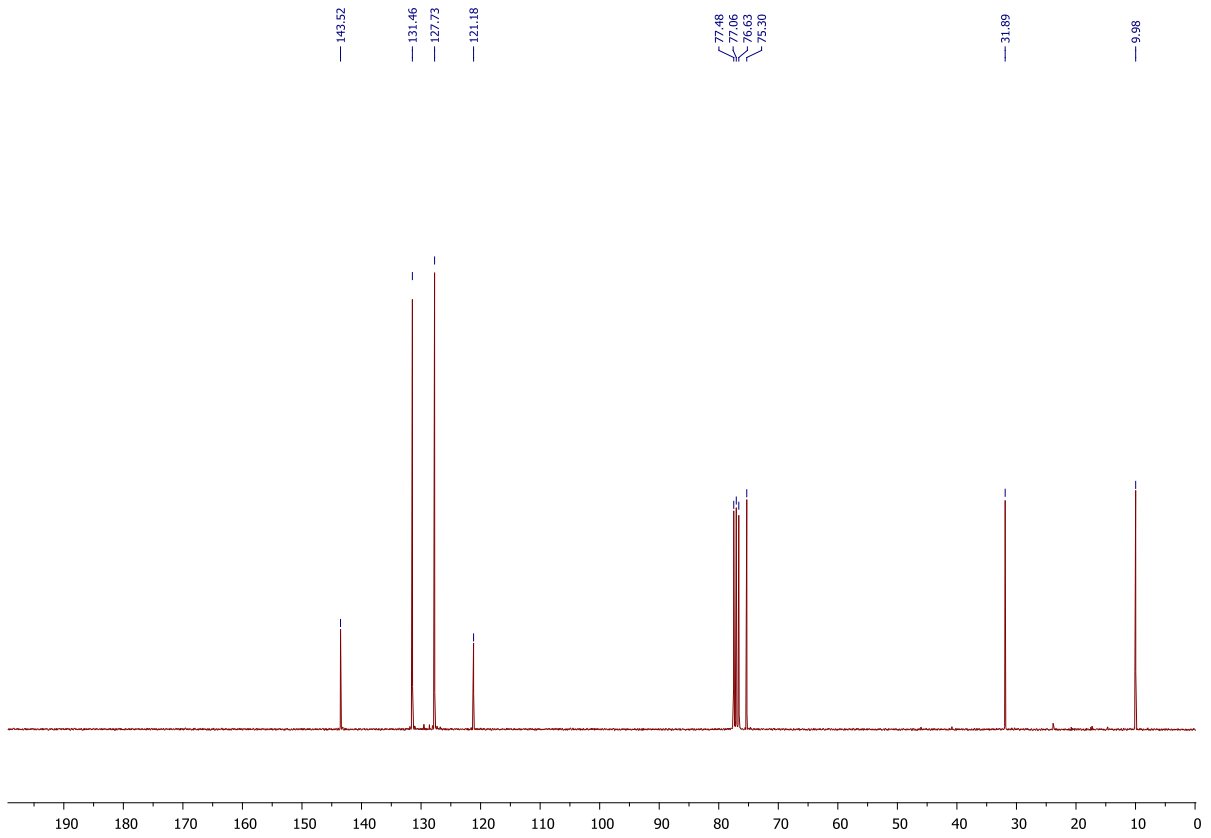

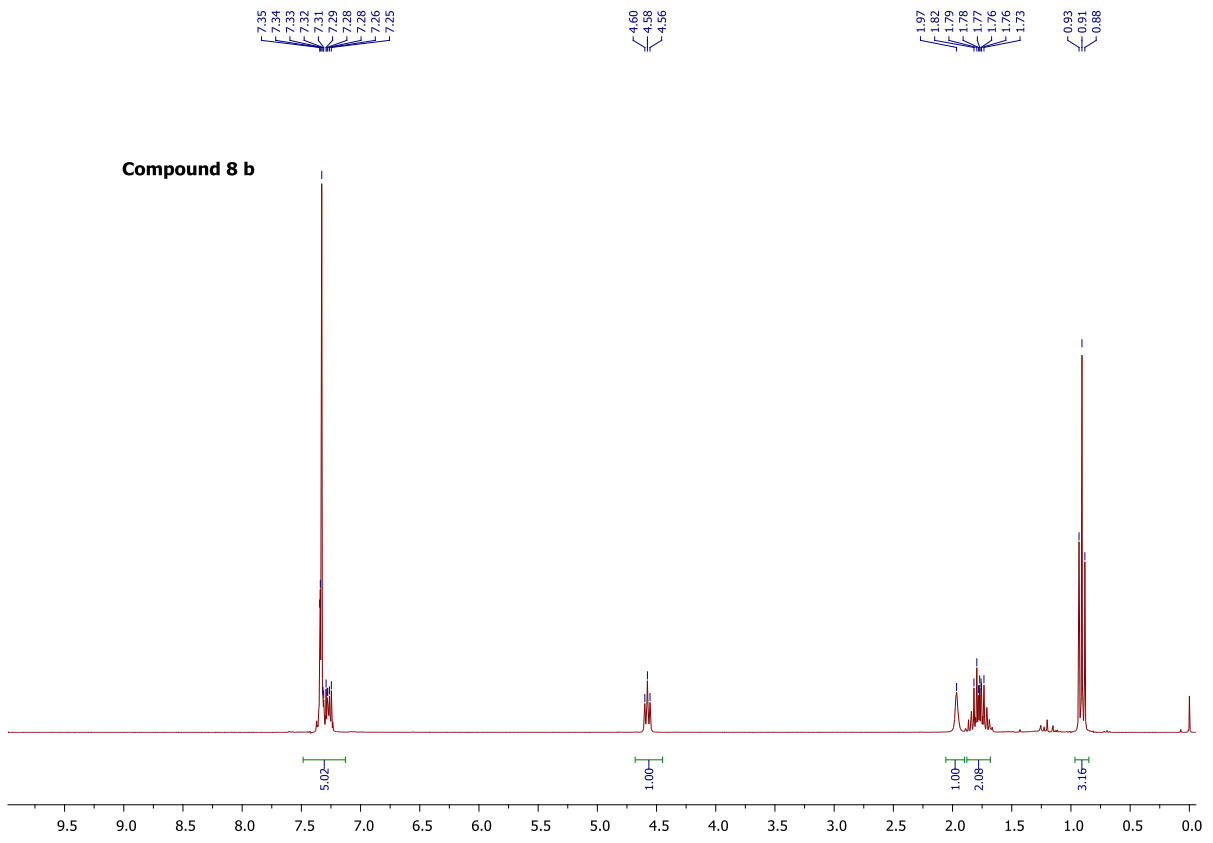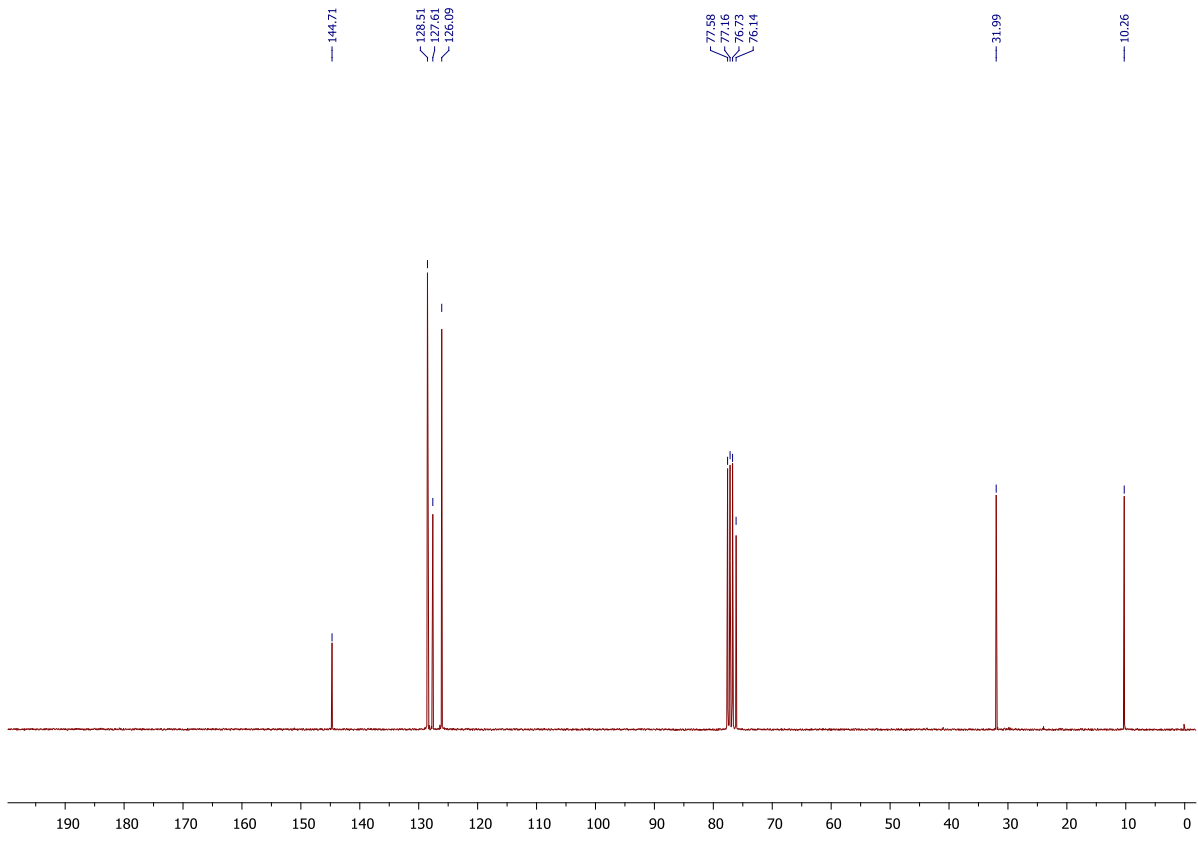

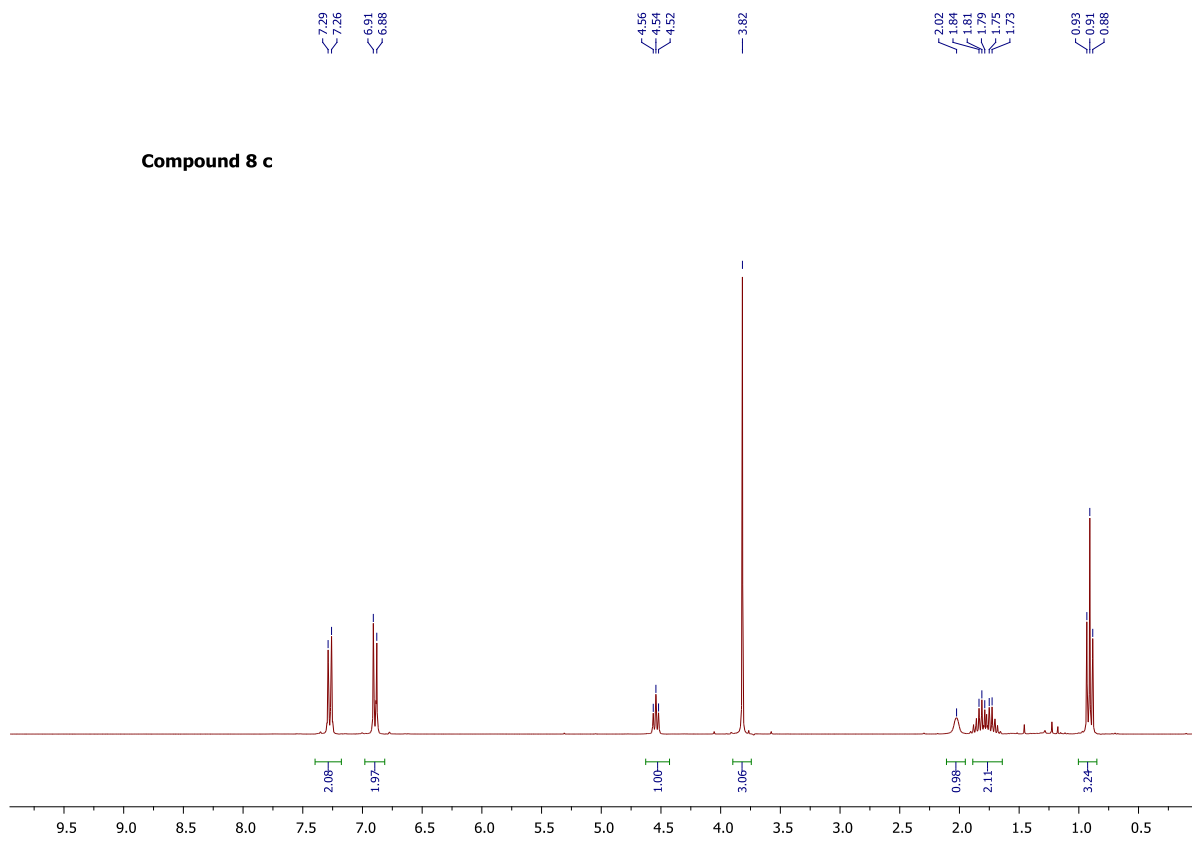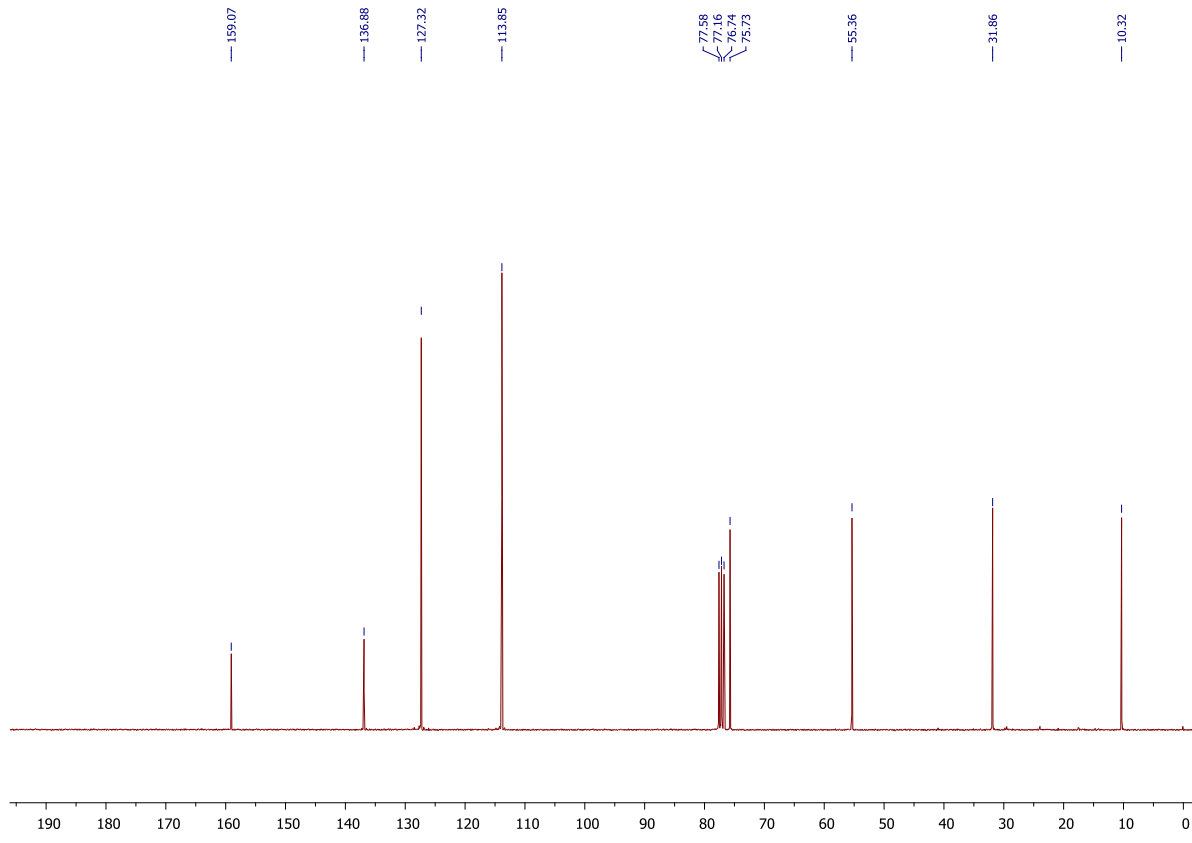

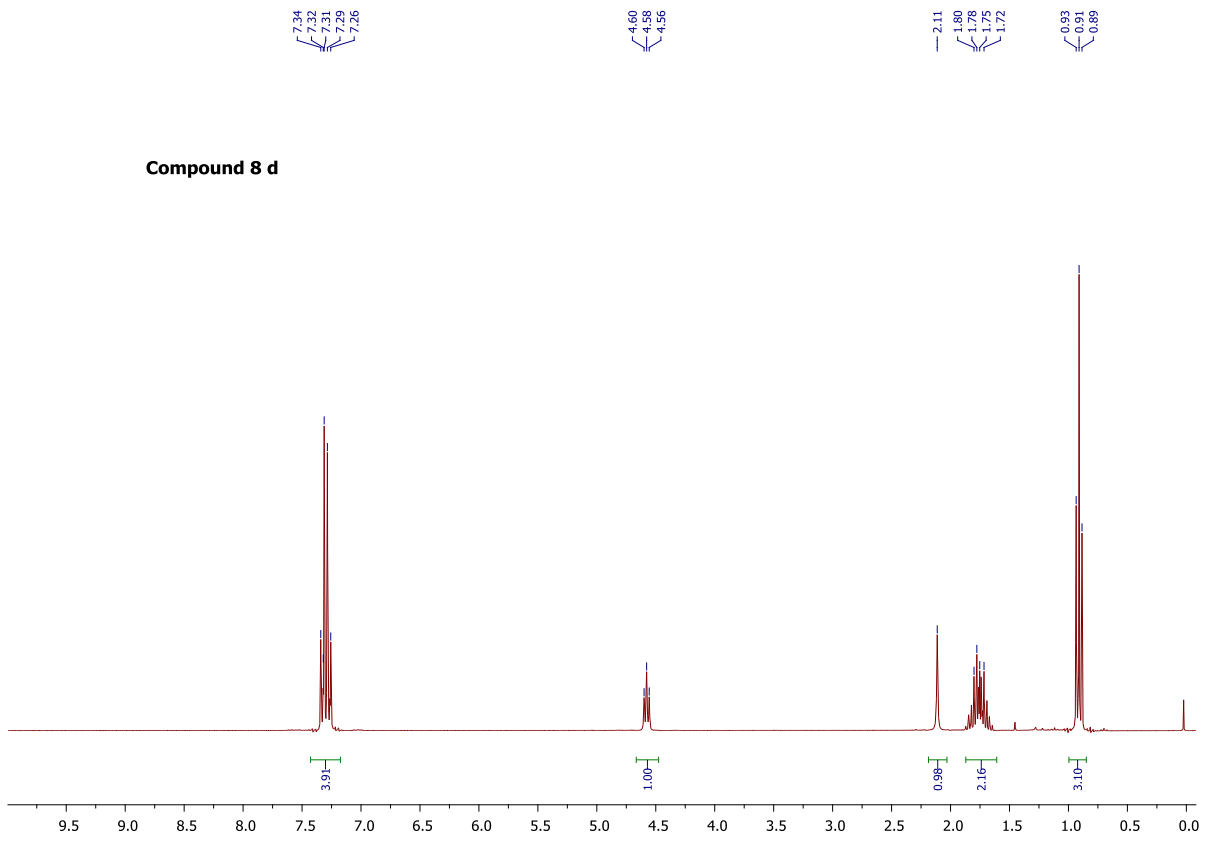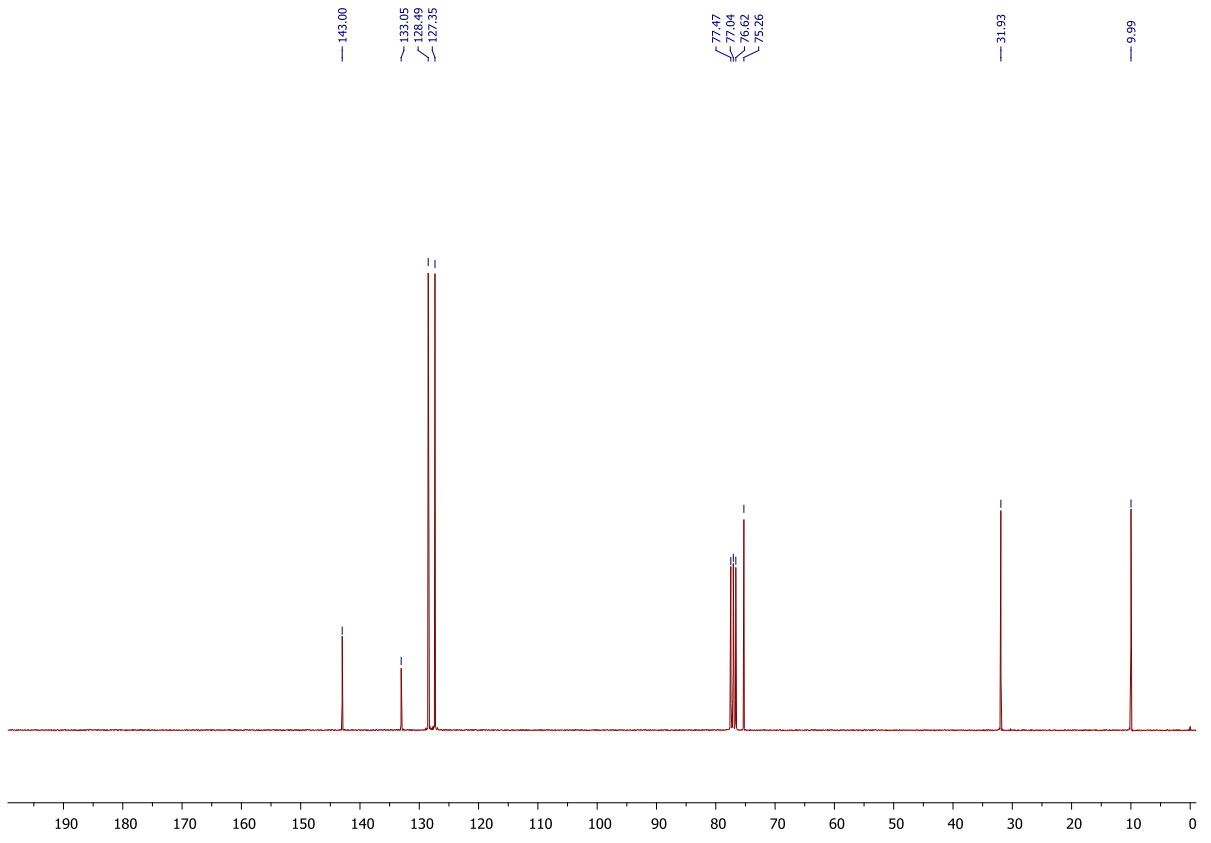



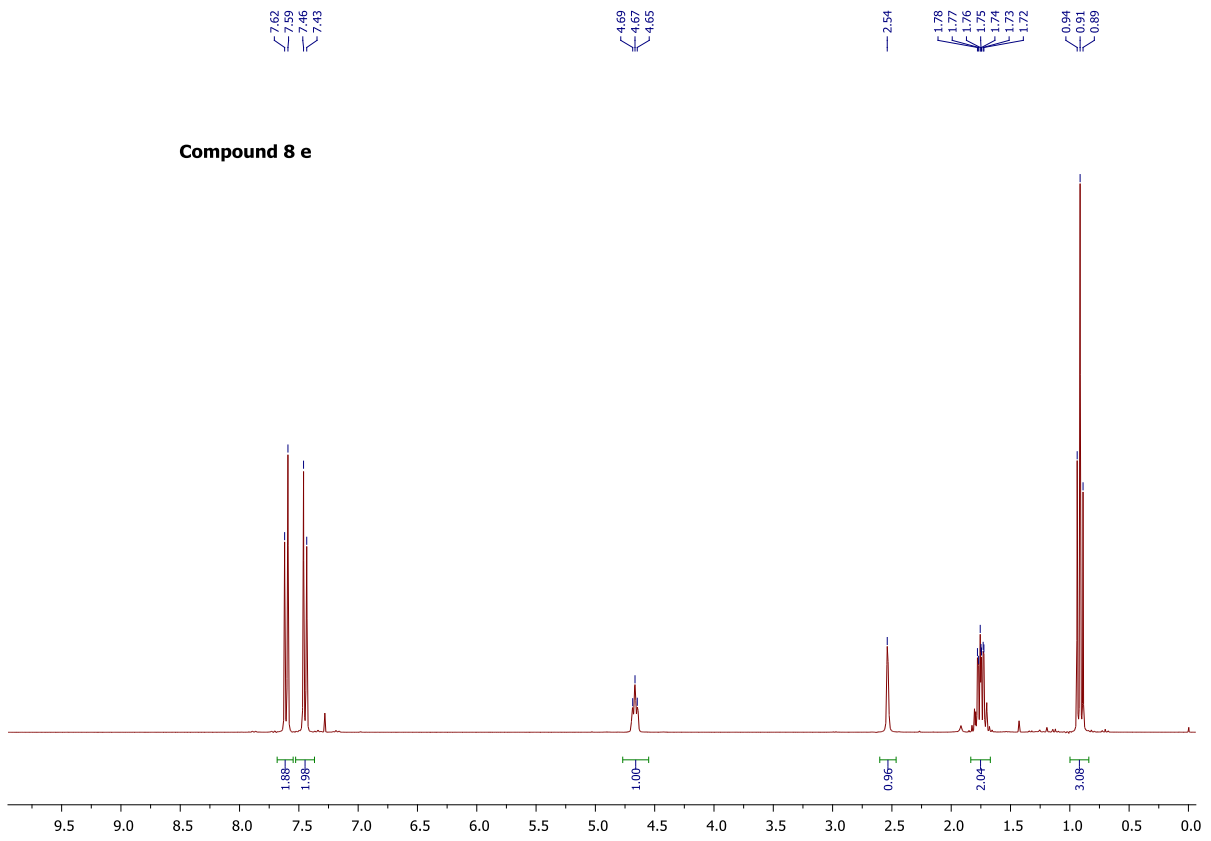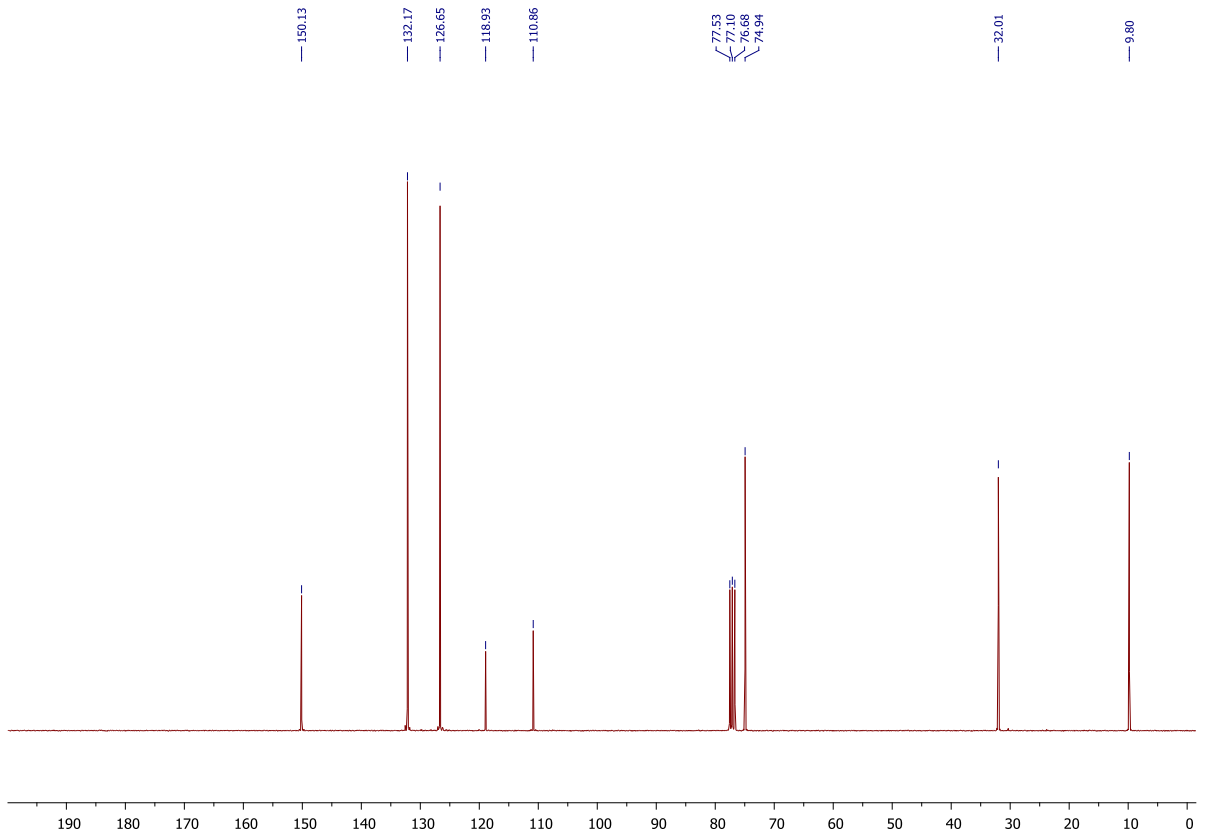

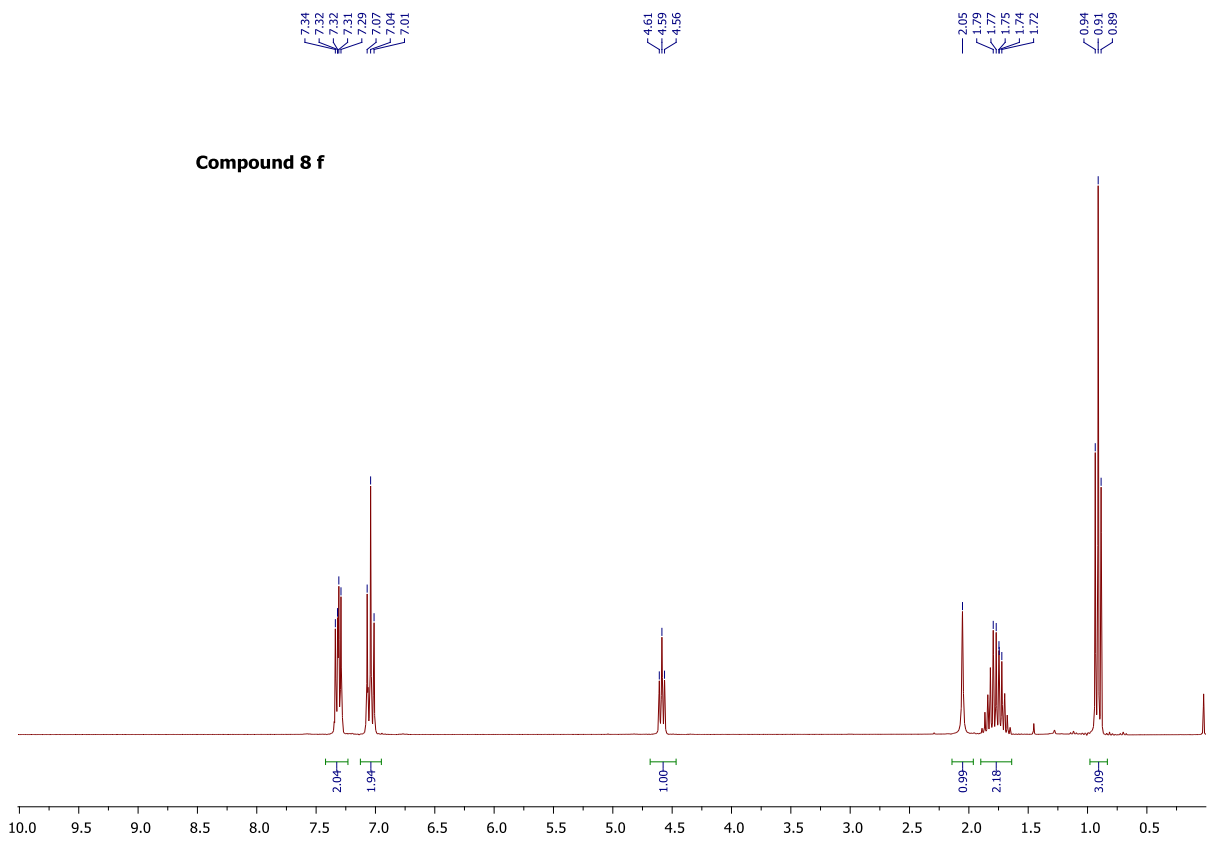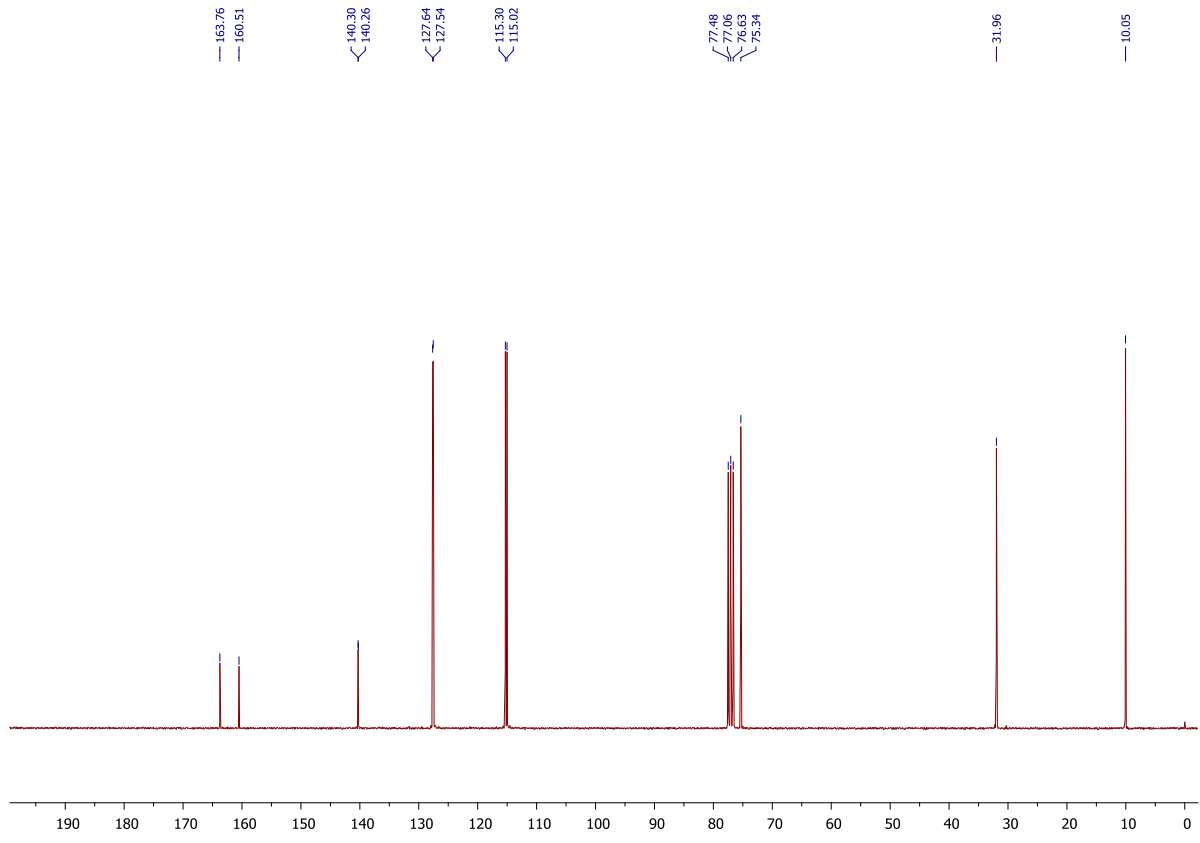

Compound 8 g

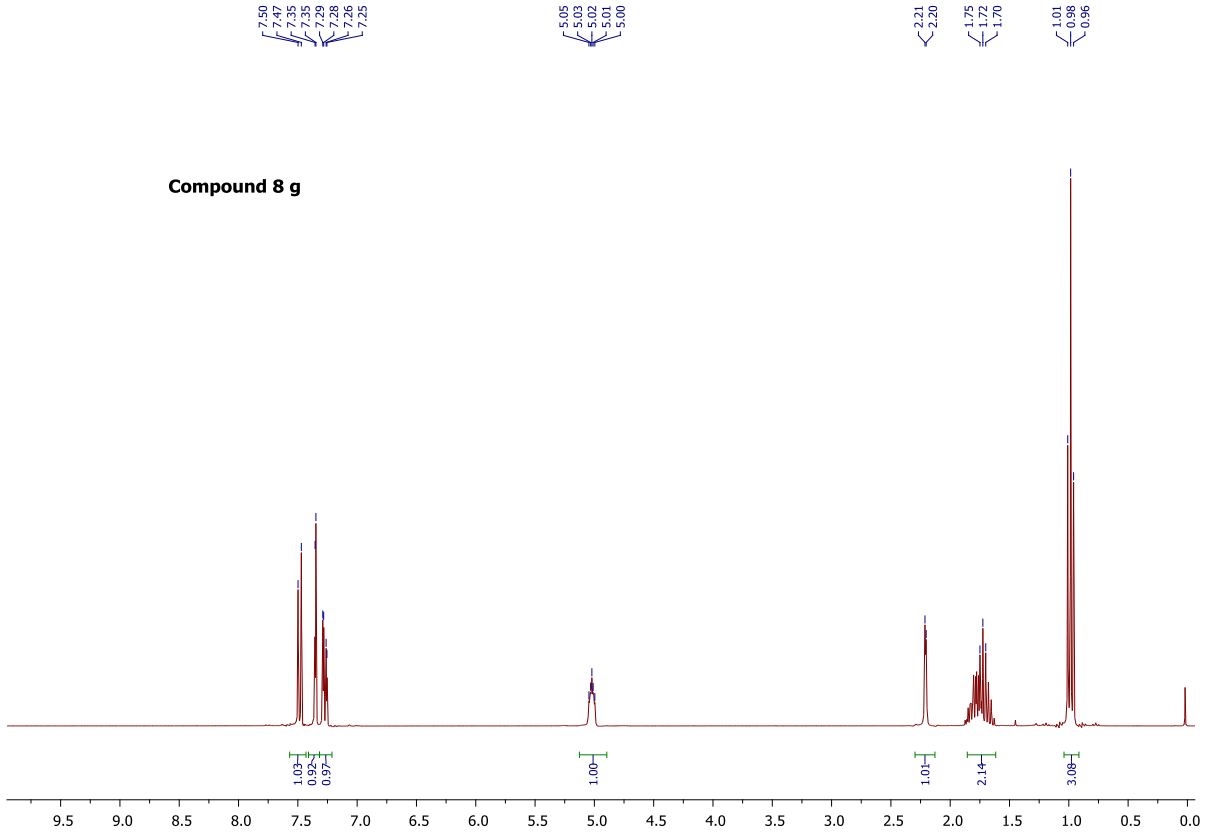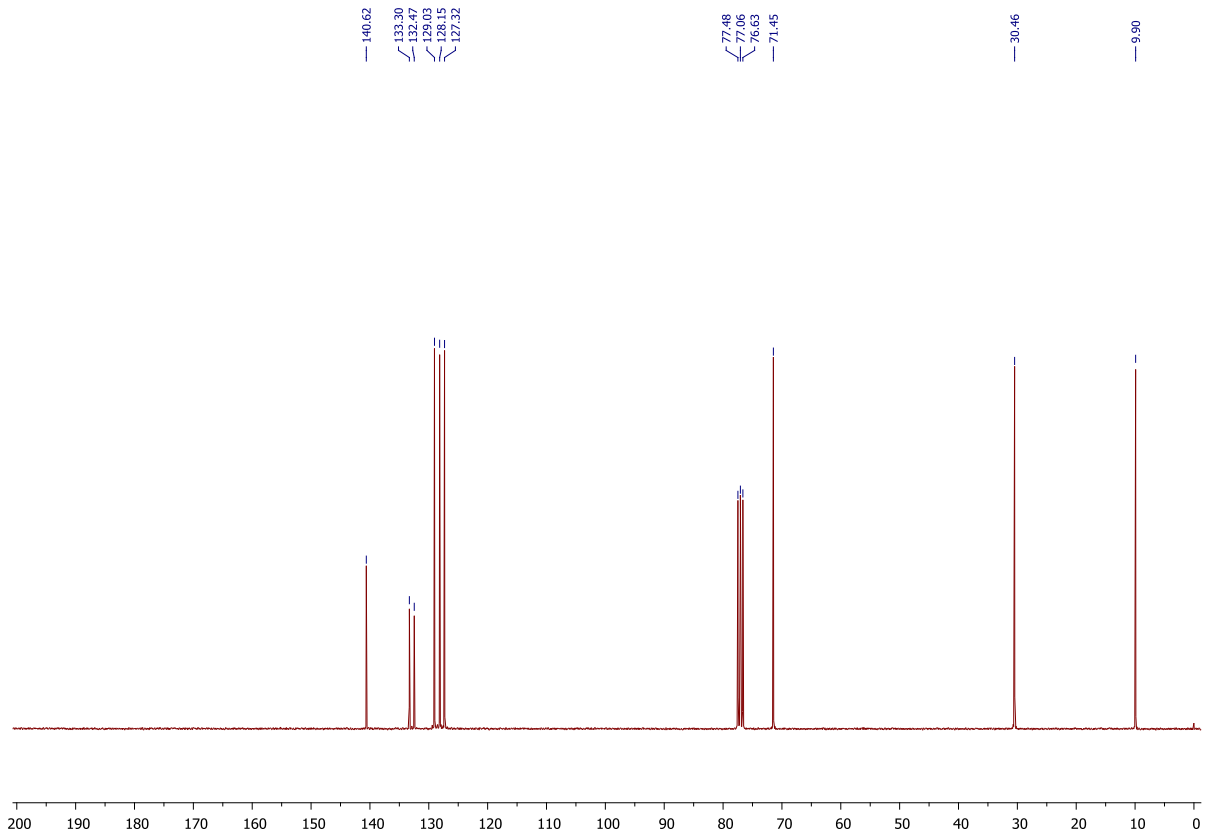

7.33  
7.33  
7.31  
7.26  
7.25  
7.24

3.62  
3.61  
3.60  
3.58  
3.57  
2.85  
2.83  
2.82  
2.82  
2.76  
2.74  
2.73  
2.71

1.82  
1.80  
1.66  
1.56  
1.53  
1.51  
1.01  
0.99  
0.96

**Compound 8 h**

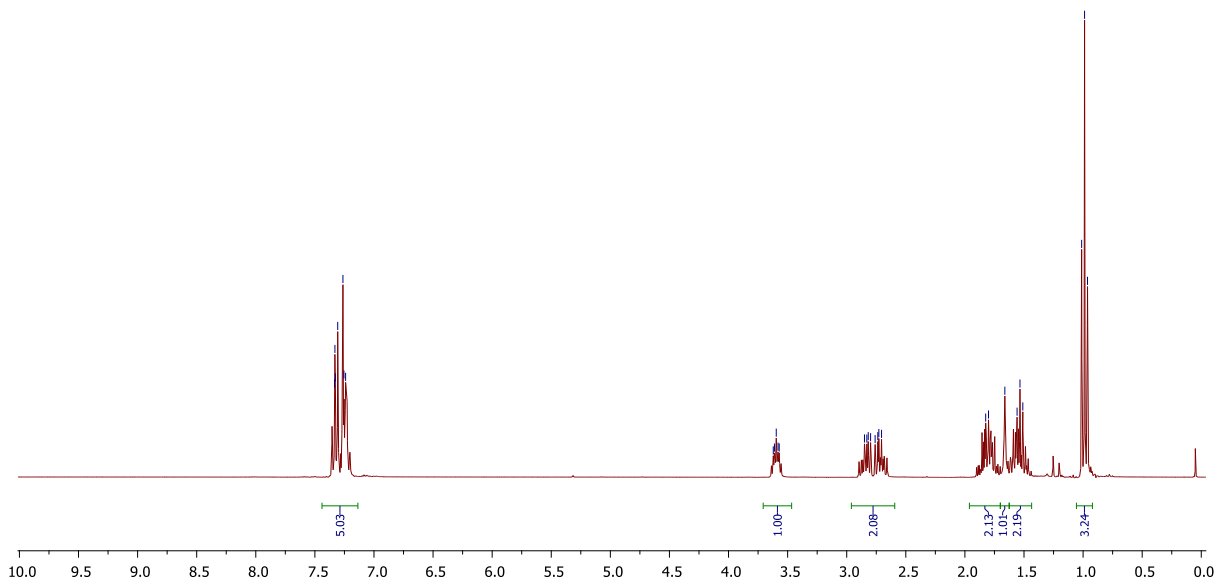

142.28

128.46  
128.43  
125.82

77.52  
77.10  
76.67  
72.68

38.62  
32.11  
30.32

9.90

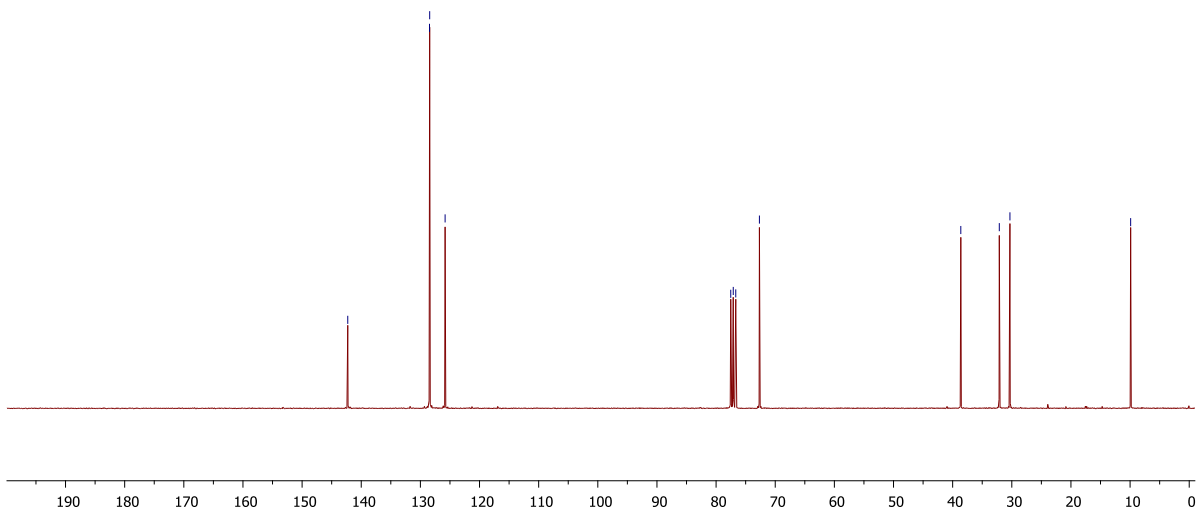

Supplement: c7nj00566k1.pdf [file c7nj00566k1.pdf]
